# Supplementary material for: Spatial analyses of archaeobotanical record reveal site uses and activities at Early to Middle Holocene Takarkori (Libya, Central Sahara)
Source: PLoS One. 2024 Oct 23;19(10):e0310739. doi: 10.1371/journal.pone.0310739 (PMC11498675; doi:10.1371/journal.pone.0310739)
Supplement: S1 File — (XLSX) [file pone.0310739.s005.xlsx]

## Sheet: Sheet1
ETS_ID	class/category	quantity	square	sector	chronolgical phase	layer_su	layer/su_category
10010	sticks	1	V24	main sector	la	174	F7-formal st. str.
10012	basketry	1	U24	main sector	la	132	M4-organic sand
10085	cordage	1	S22	main sector	la	177	F4-hearth
1138	cordage	1	U23	main sector	mp	25	M4-organic sand
1619	basketry	1	P15	northern sector	la	372	M4-organic sand
1725	cordage	1	Q16	northern sector	la	374	F7-formal st. str.
1821	wooden tool	1	T27	main sector	ep	41	M4-organic sand
1855	basketry	1	P16	northern sector	la	379	M4-organic sand
1858	basketry	1	P16	northern sector	la	379	M4-organic sand
1859	basketry	1	P15	northern sector	la	379	M4-organic sand
1864	basketry	1	P15	northern sector	la	379	M4-organic sand
1956	cordage	1	P15	northern sector	la	383	M4-organic sand
2205	cordage	1	Q16	northern sector	la	374	F7-formal st. str.
2287	wooden tool	1	Q15	northern sector	la	349	M4-organic sand
2356	sticks	1	Q16	northern sector	la	349	M4-organic sand
2357	sticks	1	Q15	northern sector	la	349	M4-organic sand
2437	barks	1	P15	northern sector	la	396	M4-organic sand
2506	cordage	1	U27	main sector	ep	38	M2-humified organic sands
2519	sticks	1	Q15	northern sector	la	396	M4-organic sand
2523	basketry	1	P16	northern sector	la	396	M4-organic sand
2560	sticks	1	V24	main sector	ep	38	M2-humified organic sands
2561	sticks	1	S22	main sector	ep	41	M4-organic sand
2562	sticks	1	S22	main sector	ep	41	M4-organic sand
2604	basketry	1	V24	main sector	ep	38	M2-humified organic sands
2605	sticks	1	V24	main sector	ep	38	M2-humified organic sands
2850	wooden pole	1	P16	northern sector	la	398	F7-formal st. str.
2865	wooden pole	1	T20	main sector	ep	41	M4-organic sand
2866	sticks	1	T19	main sector	ep	41	M4-organic sand
2975	sticks	1	P15	northern sector	la	407	M4-organic sand
3246	cordage	1	P16	northern sector	la	407	M4-organic sand
3276	wooden tool	1	P16	northern sector	la	396	M4-organic sand
3297	barks	1	R16	northern sector	la	409	M1-coarse sand
3674	basketry	1	S16	northern sector	ep	334	M7-dung
3978	wooden tool	1	U24	main sector	la	69	M4-organic sand
4302	wooden pole	1	R29	main sector	ep	38	M2-humified organic sands
4433	basketry	1	U23	main sector	la	69	M4-organic sand
4559	sticks	1	V26	main sector	mp	H1	B-burial
4720	wooden tool	1	V23	main sector	ep	38	M2-humified organic sands
4958	cordage	1	U29	main sector	ep	38	M2-humified organic sands
5144	wooden tool	1	T26	main sector	ep	38	M2-humified organic sands
5538	wooden tool	1	R29	main sector	ep	38	M2-humified organic sands
5559	basketry	1	U25	main sector	mp	H1	B-burial
557	basketry	1	R16	northern sector	la	339	M6-straw
569	cordage	1	S15	northern sector	la	341	F6-informal st. str.
6297	basketry	1	U26	main sector	la	107	M8-floor
6664	cordage	1	S27	main sector	la	103	M4-organic sand
6835	cordage	1	S20	main sector	la	96	M4-organic sand
6975	sticks	1	V26	main sector	ep	41	M4-organic sand
7002	basketry	1	T24	main sector	la	103	M4-organic sand
7036	wooden tool	1	U18	main sector	ep	58	M3-cemented organic sands
7050	wooden tool	1	U29	main sector	la	103	M4-organic sand
762	barks	1	S28	main sector	mp	15	F5-ash dump
7650	grass stems	1	S20	main sector	la	96	M4-organic sand
7651	grass stems	1	S20	main sector	la	96	M4-organic sand
7652	wooden tool	1	S20	main sector	la	96	M4-organic sand
7699	cordage	1	U18	main sector	ep	105	M2-humified organic sands
7780	wooden tool	1	R28	main sector	la	103	M4-organic sand
7893	wooden tool	1	P28	main sector	la	225	F4-hearth
7989	cordage	1	V25	main sector	la	107	M8-floor
8664	basketry	1	T27	main sector	la	151	F6-informal st. str.
8910	wooden tool	1	U28	main sector	la	163	F5-ash dump
8999	cordage	1	T28	main sector	la	163	F5-ash dump
9002	cordage	1	T27	main sector	la	132	M4-organic sand
9049	cordage	1	S25	main sector	la	125	F4-hearth
9183	basketry	1	T25	main sector	la	152	F4-hearth
9184	cordage	1	S30	main sector	la	166fp	F5-ash dump
923	basketry	1	R15	northern sector	la	355	M4-organic sand
9252	wooden tool	1	U27	main sector	la	132	M4-organic sand
9253	wooden tool	1	U26	main sector	la	132	M4-organic sand
9256	wooden tool	1	U25	main sector	la	152	F4-hearth
9471	wooden tool	1	U27	main sector	la	132	M4-organic sand
9472	basketry	1	U27	main sector	la	132	M4-organic sand
9476	cordage	1	V26	main sector	la	132	M4-organic sand
9488	basketry	1	U25	main sector	la	152	F4-hearth
9489	basketry	1	V24	main sector	la	132	M4-organic sand
9504	cordage	1	U25	main sector	la	152	F4-hearth
9546	cordage	1	V25	main sector	la	132	M4-organic sand
9553	basketry	1	U26	main sector	la	152	F4-hearth
958	wooden tool	1	T29	main sector	mp	25	M4-organic sand
9622	cordage	1	T24	main sector	la	132	M4-organic sand
9626	basketry	1	T24	main sector	la	132	M4-organic sand
9629	cordage	1	S22	main sector	la	132	M4-organic sand
9636	cordage	1	U23	main sector	la	132	M4-organic sand
968	wooden tool	1	U29	main sector	mp	25	M4-organic sand
A0063	wooden tool	1	U23	main sector	la	178	M4-organic sand
A0256	basketry	1	V26	main sector	la	171	M5-stone line/accumulation
A0302	sticks	1	T31	main sector	mp	33	F6-informal st. str.
A0444	basketry	1	T25	main sector	la	190	F4-hearth
A0671	sticks	1	U24	main sector	la	174	F7-formal st. str.
A0677	charcoals	1	U24	main sector	la	174	F7-formal st. str.
A0836	cordage	1	R32	main sector	mp	25	M4-organic sand
A0837	wooden tool	1	R32	main sector	mp	25	M4-organic sand
A0855	wooden tool	1	T31	main sector	mp	25	M4-organic sand
A0905	wooden tool	1	S32	main sector	mp	25	M4-organic sand
A0931	fruits	1	S33	main sector	mp	25	M4-organic sand
A1359	wooden tool	1	U31	main sector	mp	25	M4-organic sand
A1526	sticks	1	U22	main sector	la	178	M4-organic sand
A1900	basketry	1	T33	main sector	mp	25	M4-organic sand
A2109	sticks	1	V26	main sector	la	185	M5-stone line/accumulation
A2232	sticks	1	T30	main sector	la	156	M4-organic sand
A2237	sticks	1	S27	main sector	la	156	M4-organic sand
A2793	inflorescences	1	S28	main sector	la	225	F4-hearth
A2818	basketry	1	S28	main sector	la	225	F4-hearth
A2871	sticks	1	T29	main sector	la	225	F4-hearth
A3004	wooden tool	1	R27	main sector	la	195	M4-organic sand
A3567	basketry	1	T30	main sector	la	224	M4-organic sand
A3749	cordage	1	R26	main sector	la	261	F6-informal st. str.
A3750	basketry	1	R26	main sector	la	261	F6-informal st. str.
A3842	cordage	1	U34	main sector	ep	41	M4-organic sand
A4579	basketry	1	R24	main sector	ep	285	M6-straw
A4622	charcoals	1	V31	main sector	ep	239	M4-organic sand
A4726	cordage	1	S22	main sector	la	279	F4-hearth
A5264	sticks	1	Z24	main sector	la	267	F5-ash dump
A5459	cordage	1	S32	main sector	ep	38	M2-humified organic sands
A5460	cordage	1	S32	main sector	ep	285	M6-straw
A6137	basketry	1	T32	main sector	la	132	M4-organic sand
A6329	cordage	1	T31	main sector	la	156	M4-organic sand
A6711	cordage	1	S29	main sector	la	314	F4-hearth
A6717	sticks	1	S28	main sector	la	225	F4-hearth
A6746	basketry	1	S28	main sector	la	314	F4-hearth
A6751	sticks	1	U31	main sector	la	156	M4-organic sand
049-001	charcoals	24	U23	main sector	lp	5	F4-hearth
049-001	barks	16	U23	main sector	lp	5	F4-hearth
049-001	grass stems	1	U23	main sector	lp	5	F4-hearth
049-001	fruits	3	U23	main sector	lp	5	F4-hearth
049-001	sticks	5	U23	main sector	lp	5	F4-hearth
049-001	twigs	5	U23	main sector	lp	5	F4-hearth
049-002	charcoals	9	U20	main sector	mp	25	M4-organic sand
049-002	barks	5	U20	main sector	mp	25	M4-organic sand
049-002	grass stems	2	U20	main sector	mp	25	M4-organic sand
049-002	fruits	6	U20	main sector	mp	25	M4-organic sand
049-002	sticks	3	U20	main sector	mp	25	M4-organic sand
049-002	twigs	2	U20	main sector	mp	25	M4-organic sand
049-003	charcoals	8	U29	main sector	mp	25	M4-organic sand
049-003	barks	7	U29	main sector	mp	25	M4-organic sand
049-003	twigs	1	U29	main sector	mp	25	M4-organic sand
049-004	charcoals	5.5	V22	main sector	ep	41	M4-organic sand
049-004	charcoals	5.5	V23	main sector	ep	41	M4-organic sand
049-004	barks	2.5	V22	main sector	ep	41	M4-organic sand
049-004	barks	2.5	V23	main sector	ep	41	M4-organic sand
049-004	fruits	1	V22	main sector	ep	41	M4-organic sand
049-004	fruits	1	V23	main sector	ep	41	M4-organic sand
049-004	twigs	2	V22	main sector	ep	41	M4-organic sand
049-004	twigs	2	V23	main sector	ep	41	M4-organic sand
049-005	charcoals	6	S24	main sector	mp	25	M4-organic sand
049-005	barks	3	S24	main sector	mp	25	M4-organic sand
049-005	fruits	1	S24	main sector	mp	25	M4-organic sand
049-006	barks	3	S22	main sector	lp	21	F7-formal st. str.
049-006	fruits	1	S22	main sector	lp	21	F7-formal st. str.
049-007	charcoals	4	S21	main sector	mp	25	M4-organic sand
049-007	barks	2	S21	main sector	mp	25	M4-organic sand
049-007	fruits	1	S21	main sector	mp	25	M4-organic sand
049-007	twigs	1	S21	main sector	mp	25	M4-organic sand
049-008	charcoals	24	V24	main sector	mp	25	M4-organic sand
049-008	barks	13	V24	main sector	mp	25	M4-organic sand
049-008	grass stems	4	V24	main sector	mp	25	M4-organic sand
049-008	fruits	4	V24	main sector	mp	25	M4-organic sand
049-008	sticks	3	V24	main sector	mp	25	M4-organic sand
049-008	roots	1	V24	main sector	mp	25	M4-organic sand
049-008	twigs	6	V24	main sector	mp	25	M4-organic sand
049-009	charcoals	7	U21	main sector	mp	25	M4-organic sand
049-009	barks	5	U21	main sector	mp	25	M4-organic sand
049-009	grass stems	3	U21	main sector	mp	25	M4-organic sand
049-009	sticks	2	U21	main sector	mp	25	M4-organic sand
049-009	twigs	1	U21	main sector	mp	25	M4-organic sand
049-010	charcoals	2	S23	main sector	mp	25	M4-organic sand
049-010	barks	2	S23	main sector	mp	25	M4-organic sand
049-011	charcoals	6	S20	main sector	mp	25	M4-organic sand
049-011	barks	4	S20	main sector	mp	25	M4-organic sand
049-012	charcoals	26	T26	main sector	mp	25	M4-organic sand
049-012	fruits	4	T26	main sector	mp	25	M4-organic sand
049-013	charcoals	5	U19	main sector	mp	25	M4-organic sand
049-013	grass stems	1	U19	main sector	mp	25	M4-organic sand
049-013	fruits	4	U19	main sector	mp	25	M4-organic sand
049-013	sticks	1	U19	main sector	mp	25	M4-organic sand
049-014	charcoals	4	T27	main sector	mp	25	M4-organic sand
049-014	barks	1	T27	main sector	mp	25	M4-organic sand
049-014	fruits	1	T27	main sector	mp	25	M4-organic sand
049-015	charcoals	3	U20	main sector	mp	25	M4-organic sand
049-015	barks	2	U20	main sector	mp	25	M4-organic sand
049-015	fruits	6	U20	main sector	mp	25	M4-organic sand
049-015	twigs	1	U20	main sector	mp	25	M4-organic sand
049-016	charcoals	14	U22	main sector	mp	25	M4-organic sand
049-016	barks	17	U22	main sector	mp	25	M4-organic sand
049-016	grass stems	2	U22	main sector	mp	25	M4-organic sand
049-016	fruits	10	U22	main sector	mp	25	M4-organic sand
049-016	sticks	1	U22	main sector	mp	25	M4-organic sand
049-016	twigs	8	U22	main sector	mp	25	M4-organic sand
049-017	charcoals	41	U27	main sector	mp	25	M4-organic sand
049-017	barks	14	U27	main sector	mp	25	M4-organic sand
049-017	grass stems	2	U27	main sector	mp	25	M4-organic sand
049-017	fruits	14	U27	main sector	mp	25	M4-organic sand
049-017	sticks	5	U27	main sector	mp	25	M4-organic sand
049-017	twigs	4	U27	main sector	mp	25	M4-organic sand
049-018	charcoals	5	T22	main sector	mp	25	M4-organic sand
049-018	fruits	1	T22	main sector	mp	25	M4-organic sand
049-019	charcoals	13	U24	main sector	mp	25	M4-organic sand
049-019	barks	4	U24	main sector	mp	25	M4-organic sand
049-019	grass stems	1	U24	main sector	mp	25	M4-organic sand
049-019	fruits	1	U24	main sector	mp	25	M4-organic sand
049-020	charcoals	16	S28	main sector	mp	25	M4-organic sand
049-021	charcoals	11	U30	main sector	mp	25	M4-organic sand
049-021	barks	10	U30	main sector	mp	25	M4-organic sand
049-021	grass stems	3	U30	main sector	mp	25	M4-organic sand
049-021	fruits	5	U30	main sector	mp	25	M4-organic sand
049-021	sticks	5	U30	main sector	mp	25	M4-organic sand
049-021	twigs	8	U30	main sector	mp	25	M4-organic sand
049-022	charcoals	5	V27	main sector	mp	25	M4-organic sand
049-022	barks	6	V27	main sector	mp	25	M4-organic sand
049-022	fruits	3	V27	main sector	mp	25	M4-organic sand
049-023	charcoals	4	T18	main sector	mp	25	M4-organic sand
049-023	barks	1	T18	main sector	mp	25	M4-organic sand
049-023	fruits	2	T18	main sector	mp	25	M4-organic sand
049-024	charcoals	21	T21	main sector	mp	25	M4-organic sand
049-024	barks	3	T21	main sector	mp	25	M4-organic sand
049-024	fruits	2	T21	main sector	mp	25	M4-organic sand
049-025	charcoals	1	U18	main sector	mp	25	M4-organic sand
049-025	barks	1	U18	main sector	mp	25	M4-organic sand
049-026	charcoals	10	U25	main sector	mp	25	M4-organic sand
049-026	barks	2	U25	main sector	mp	25	M4-organic sand
049-026	fruits	5	U25	main sector	mp	25	M4-organic sand
049-026	sticks	5	U25	main sector	mp	25	M4-organic sand
049-027	charcoals	5	T20	main sector	mp	25	M4-organic sand
049-027	barks	5	T20	main sector	mp	25	M4-organic sand
049-027	fruits	5	T20	main sector	mp	25	M4-organic sand
049-027	sticks	3	T20	main sector	mp	25	M4-organic sand
049-027	twigs	1	T20	main sector	mp	25	M4-organic sand
049-028	fruits	1	T26	main sector	mp	25	M4-organic sand
049-029	charcoals	1	V22	main sector	mp	25	M4-organic sand
049-029	barks	1	V22	main sector	mp	25	M4-organic sand
049-029	grass stems	2	V22	main sector	mp	25	M4-organic sand
049-029	fruits	1	V22	main sector	mp	25	M4-organic sand
049-029	twigs	3	V22	main sector	mp	25	M4-organic sand
049-030	charcoals	30	T29	main sector	mp	25	M4-organic sand
049-030	barks	16	T29	main sector	mp	25	M4-organic sand
049-030	grass stems	1	T29	main sector	mp	25	M4-organic sand
049-030	leaves	1	T29	main sector	mp	25	M4-organic sand
049-030	fruits	5	T29	main sector	mp	25	M4-organic sand
049-030	sticks	5	T29	main sector	mp	25	M4-organic sand
049-031	charcoals	30	S29	main sector	mp	25	M4-organic sand
049-031	barks	3	S29	main sector	mp	25	M4-organic sand
049-031	grass stems	4	S29	main sector	mp	25	M4-organic sand
049-031	fruits	6	S29	main sector	mp	25	M4-organic sand
049-032	charcoals	45	T27	main sector	mp	25	M4-organic sand
049-032	barks	3	T27	main sector	mp	25	M4-organic sand
049-032	fruits	5	T27	main sector	mp	25	M4-organic sand
049-032	sticks	3	T27	main sector	mp	25	M4-organic sand
049-032	twigs	3	T27	main sector	mp	25	M4-organic sand
049-033	charcoals	36	T30	main sector	mp	25	M4-organic sand
049-033	barks	13	T30	main sector	mp	25	M4-organic sand
049-033	grass stems	1	T30	main sector	mp	25	M4-organic sand
049-033	fruits	14	T30	main sector	mp	25	M4-organic sand
049-033	sticks	4	T30	main sector	mp	25	M4-organic sand
049-033	twigs	1	T30	main sector	mp	25	M4-organic sand
049-034	charcoals	3	T19	main sector	mp	25	M4-organic sand
049-034	barks	5	T19	main sector	mp	25	M4-organic sand
049-034	fruits	2	T19	main sector	mp	25	M4-organic sand
049-034	twigs	1	T19	main sector	mp	25	M4-organic sand
049-035	fruits	1	V27	main sector	lp	7	M4-organic sand
049-035	twigs	1	V27	main sector	lp	7	M4-organic sand
049-036	charcoals	2	V20	main sector	mp	25	M4-organic sand
049-036	fruits	1	V20	main sector	mp	25	M4-organic sand
049-037	charcoals	24	S26	main sector	mp	25	M4-organic sand
049-037	barks	1	S26	main sector	mp	25	M4-organic sand
049-037	fruits	2	S26	main sector	mp	25	M4-organic sand
049-038	charcoals	15	S30	main sector	mp	25	M4-organic sand
049-038	barks	7	S30	main sector	mp	25	M4-organic sand
049-038	fruits	1	S30	main sector	mp	25	M4-organic sand
049-038	sticks	5	S30	main sector	mp	25	M4-organic sand
049-039	charcoals	6	S22	main sector	lp	21	F7-formal st. str.
049-039	barks	3	S22	main sector	lp	21	F7-formal st. str.
049-039	grass stems	1	S22	main sector	lp	21	F7-formal st. str.
049-039	fruits	8	S22	main sector	lp	21	F7-formal st. str.
049-039	sticks	3	S22	main sector	lp	21	F7-formal st. str.
049-040	charcoals	13	U28	main sector	mp	25	M4-organic sand
049-040	barks	8	U28	main sector	mp	25	M4-organic sand
049-040	grass stems	3	U28	main sector	mp	25	M4-organic sand
049-040	fruits	15	U28	main sector	mp	25	M4-organic sand
049-040	sticks	3	U28	main sector	mp	25	M4-organic sand
049-040	twigs	6	U28	main sector	mp	25	M4-organic sand
049-041	charcoals	59	T28	main sector	mp	25	M4-organic sand
049-041	barks	8	T28	main sector	mp	25	M4-organic sand
049-041	grass stems	4	T28	main sector	mp	25	M4-organic sand
049-041	fruits	16	T28	main sector	mp	25	M4-organic sand
049-041	sticks	3	T28	main sector	mp	25	M4-organic sand
049-041	twigs	4	T28	main sector	mp	25	M4-organic sand
049-042	charcoals	14	T24	main sector	mp	25	M4-organic sand
049-042	barks	4	T24	main sector	mp	25	M4-organic sand
049-042	grass stems	1	T24	main sector	mp	25	M4-organic sand
049-042	fruits	10	T24	main sector	mp	25	M4-organic sand
049-042	roots	1	T24	main sector	mp	25	M4-organic sand
049-042	twigs	1	T24	main sector	mp	25	M4-organic sand
049-042	seeds	1	T24	main sector	mp	25	M4-organic sand
049-043	charcoals	6	U23	main sector	mp	25	M4-organic sand
049-043	barks	2	U23	main sector	mp	25	M4-organic sand
049-043	fruits	4	U23	main sector	mp	25	M4-organic sand
049-043	sticks	1	U23	main sector	mp	25	M4-organic sand
049-043	twigs	3	U23	main sector	mp	25	M4-organic sand
049-044	barks	1	S28	main sector	mp	25	M4-organic sand
049-044	grass stems	2	S28	main sector	mp	25	M4-organic sand
049-044	seeds	1	S28	main sector	mp	25	M4-organic sand
049-045	barks	1	U29	main sector	mp	25	M4-organic sand
049-045	grass stems	1	U29	main sector	mp	25	M4-organic sand
049-046	charcoals	9	V21	main sector	mp	25	M4-organic sand
049-046	barks	1	V21	main sector	mp	25	M4-organic sand
049-046	grass stems	4	V21	main sector	mp	25	M4-organic sand
049-046	twigs	2	V21	main sector	mp	25	M4-organic sand
049-047	charcoals	3	T25	main sector	mp	25	M4-organic sand
049-047	barks	2	T25	main sector	mp	25	M4-organic sand
049-047	fruits	2	T25	main sector	mp	25	M4-organic sand
049-047	roots	1	T25	main sector	mp	25	M4-organic sand
049-048	charcoals	13	U26	main sector	mp	25	M4-organic sand
049-048	barks	2	U26	main sector	mp	25	M4-organic sand
049-048	grass stems	2	U26	main sector	mp	25	M4-organic sand
049-048	fruits	7	U26	main sector	mp	25	M4-organic sand
049-049	charcoals	4	T23	main sector	mp	25	M4-organic sand
049-049	barks	2	T23	main sector	mp	25	M4-organic sand
049-049	grass stems	1	T23	main sector	mp	25	M4-organic sand
049-049	fruits	1	T23	main sector	mp	25	M4-organic sand
049-049	sticks	1	T23	main sector	mp	25	M4-organic sand
049-049	twigs	1	T23	main sector	mp	25	M4-organic sand
049-050	charcoals	7	V28	main sector	lp	7	M4-organic sand
049-050	barks	2	V28	main sector	lp	7	M4-organic sand
049-050	fruits	1	V28	main sector	lp	7	M4-organic sand
049-050	twigs	2	V28	main sector	lp	7	M4-organic sand
049-051	charcoals	7	S27	main sector	mp	25	M4-organic sand
049-051	barks	2	S27	main sector	mp	25	M4-organic sand
049-051	grass stems	1	S27	main sector	mp	25	M4-organic sand
049-051	fruits	1	S27	main sector	mp	25	M4-organic sand
049-051	sticks	2	S27	main sector	mp	25	M4-organic sand
049-051	twigs	2	S27	main sector	mp	25	M4-organic sand
049-052	charcoals	5	V27	main sector	ep	38	M2-humified organic sands
049-052	barks	2	V27	main sector	ep	38	M2-humified organic sands
049-052	twigs	1	V27	main sector	ep	38	M2-humified organic sands
050-005	charcoals	5	U22	main sector	lp	7	M4-organic sand
050-005	barks	2	U22	main sector	lp	7	M4-organic sand
050-005	grass stems	1	U22	main sector	lp	7	M4-organic sand
050-005	fruits	1	U22	main sector	lp	7	M4-organic sand
050-005	sticks	1	U22	main sector	lp	7	M4-organic sand
050-005	twigs	2	U22	main sector	lp	7	M4-organic sand
050-006	barks	1	S18	main sector	lp	7	M4-organic sand
050-007	charcoals	2	U24	main sector	lp	7	M4-organic sand
050-007	fruits	2	U24	main sector	lp	7	M4-organic sand
050-007	sticks	1	U24	main sector	lp	7	M4-organic sand
050-008	charcoals	7	T29	main sector	lp	7	M4-organic sand
050-008	barks	6	T29	main sector	lp	7	M4-organic sand
050-008	grass stems	3	T29	main sector	lp	7	M4-organic sand
050-008	fruits	5	T29	main sector	lp	7	M4-organic sand
050-008	twigs	5	T29	main sector	lp	7	M4-organic sand
050-009	barks	1	S22	main sector	lp	7	M4-organic sand
050-010	charcoals	7	S28	main sector	lp	7	M4-organic sand
050-010	fruits	1	S28	main sector	lp	7	M4-organic sand
050-011	charcoals	1	U27	main sector	lp	7	M4-organic sand
050-012	barks	6	T22	main sector	lp	7	M4-organic sand
050-012	fruits	1	T22	main sector	lp	7	M4-organic sand
050-012	twigs	1	T22	main sector	lp	7	M4-organic sand
050-013	charcoals	6	U20	main sector	lp	7	M4-organic sand
050-013	barks	1	U20	main sector	lp	7	M4-organic sand
050-013	fruits	3	U20	main sector	lp	7	M4-organic sand
050-013	sticks	1	U20	main sector	lp	7	M4-organic sand
050-014	charcoals	1	S19	main sector	lp	7	M4-organic sand
050-014	barks	1	S19	main sector	lp	7	M4-organic sand
050-014	roots	2	S19	main sector	lp	7	M4-organic sand
050-015	sticks	1	V22	main sector	lp	7	M4-organic sand
050-016	barks	1	T25	main sector	lp	7	M4-organic sand
050-017	charcoals	1	U23	main sector	lp	7	M4-organic sand
050-017	sticks	1	U23	main sector	lp	7	M4-organic sand
050-018	charcoals	7	U21	main sector	lp	7	M4-organic sand
050-018	barks	4	U21	main sector	lp	7	M4-organic sand
050-018	sticks	1	U21	main sector	lp	7	M4-organic sand
050-018	twigs	3	U21	main sector	lp	7	M4-organic sand
050-019	charcoals	2	U18	main sector	lp	7	M4-organic sand
050-020	charcoals	3	T19	main sector	lp	7	M4-organic sand
050-020	barks	2	T19	main sector	lp	7	M4-organic sand
050-021	barks	4	T20	main sector	lp	7	M4-organic sand
050-021	twigs	1	T20	main sector	lp	7	M4-organic sand
050-022	charcoals	1	T18	main sector	lp	7	M4-organic sand
050-022	barks	5	T18	main sector	lp	7	M4-organic sand
050-023	charcoals	4	T21	main sector	lp	7	M4-organic sand
050-023	barks	1	T21	main sector	lp	7	M4-organic sand
050-023	grass stems	1	T21	main sector	lp	7	M4-organic sand
050-024	charcoals	1	V24	main sector	lp	7	M4-organic sand
050-024	barks	3	V24	main sector	lp	7	M4-organic sand
050-024	fruits	2	V24	main sector	lp	7	M4-organic sand
050-024	twigs	1	V24	main sector	lp	7	M4-organic sand
050-025	charcoals	1	S27	main sector	lp	7	M4-organic sand
050-026	charcoals	13	U19	main sector	lp	7	M4-organic sand
050-026	barks	3	U19	main sector	lp	7	M4-organic sand
050-026	fruits	2	U19	main sector	lp	7	M4-organic sand
050-027	charcoals	6	V23	main sector	lp	7	M4-organic sand
050-027	barks	3	V23	main sector	lp	7	M4-organic sand
050-027	grass stems	1	V23	main sector	lp	7	M4-organic sand
050-027	fruits	3	V23	main sector	lp	7	M4-organic sand
050-028	charcoals	9	T30	main sector	lp	7	M4-organic sand
050-028	barks	2	T30	main sector	lp	7	M4-organic sand
050-028	fruits	1	T30	main sector	lp	7	M4-organic sand
050-029	charcoals	1	S20	main sector	lp	7	M4-organic sand
050-029	barks	2	S20	main sector	lp	7	M4-organic sand
050-030	charcoals	1	T23	main sector	lp	7	M4-organic sand
050-030	barks	1	T23	main sector	lp	7	M4-organic sand
050-030	grass stems	1	T23	main sector	lp	7	M4-organic sand
050-031	charcoals	2	T28	main sector	lp	7	M4-organic sand
050-031	barks	3	T28	main sector	lp	7	M4-organic sand
050-031	fruits	4	T28	main sector	lp	7	M4-organic sand
050-031	twigs	1	T28	main sector	lp	7	M4-organic sand
050-033	charcoals	1	V27	main sector	lp	7	M4-organic sand
050-035	charcoals	1	T24	main sector	lp	7	M4-organic sand
057-001	charcoals	6	V23	main sector	lp	24	F4-hearth
057-001	barks	1	V23	main sector	lp	24	F4-hearth
057-001	fruits	1	V23	main sector	lp	24	F4-hearth
057-001	twigs	2	V23	main sector	lp	24	F4-hearth
057-002	charcoals	3.5	T26	main sector	mp	34	F5-ash dump
057-002	charcoals	3.5	T27	main sector	mp	34	F5-ash dump
057-002	fruits	3	T26	main sector	mp	34	F5-ash dump
057-002	fruits	3	T27	main sector	mp	34	F5-ash dump
057-002	sticks	1.5	T26	main sector	mp	34	F5-ash dump
057-002	sticks	1.5	T27	main sector	mp	34	F5-ash dump
057-002	twigs	1.5	T26	main sector	mp	34	F5-ash dump
057-002	twigs	1.5	T27	main sector	mp	34	F5-ash dump
057-003	charcoals	15	U28	main sector	ep	61	F4-hearth
057-003	grass stems	1	U28	main sector	ep	61	F4-hearth
057-003	fruits	3	U28	main sector	ep	61	F4-hearth
057-004	barks	0.2	U28	main sector	mp	9	M4-organic sand
057-004	barks	0.2	U29	main sector	mp	9	M4-organic sand
057-004	barks	0.2	U30	main sector	mp	9	M4-organic sand
057-004	barks	0.2	V28	main sector	mp	9	M4-organic sand
057-004	barks	0.2	V29	main sector	mp	9	M4-organic sand
057-004	fruits	1	U28	main sector	mp	9	M4-organic sand
057-004	fruits	1	U29	main sector	mp	9	M4-organic sand
057-004	fruits	1	U30	main sector	mp	9	M4-organic sand
057-004	fruits	1	V28	main sector	mp	9	M4-organic sand
057-004	fruits	1	V29	main sector	mp	9	M4-organic sand
057-005	charcoals	14	U29	main sector	ep	60	F5-ash dump
057-005	barks	2	U29	main sector	ep	60	F5-ash dump
057-005	fruits	1	U29	main sector	ep	60	F5-ash dump
057-006	charcoals	5.5	V19	main sector	lp	29	F1-pit
057-006	charcoals	5.5	V20	main sector	lp	29	F1-pit
057-006	fruits	3	V19	main sector	lp	29	F1-pit
057-006	fruits	3	V20	main sector	lp	29	F1-pit
057-006	sticks	1.5	V19	main sector	lp	29	F1-pit
057-006	sticks	1.5	V20	main sector	lp	29	F1-pit
057-007	thorns	2	U26	main sector	ep	38	M2-humified organic sands
057-008	charcoals	17	S29	main sector	mp	55	F4-hearth
057-009	grass stems	1	S27	main sector	ep	38	M2-humified organic sands
057-009	roots	1	S27	main sector	ep	38	M2-humified organic sands
057-010	charcoals	3	U27	main sector	ep	38	M2-humified organic sands
057-010	charcoals	3	U28	main sector	ep	38	M2-humified organic sands
057-010	charcoals	3	V27	main sector	ep	38	M2-humified organic sands
057-010	charcoals	3	V28	main sector	ep	38	M2-humified organic sands
057-010	barks	1	U27	main sector	ep	38	M2-humified organic sands
057-010	barks	1	U28	main sector	ep	38	M2-humified organic sands
057-010	barks	1	V27	main sector	ep	38	M2-humified organic sands
057-010	barks	1	V28	main sector	ep	38	M2-humified organic sands
057-010	twigs	1	U27	main sector	ep	38	M2-humified organic sands
057-010	twigs	1	U28	main sector	ep	38	M2-humified organic sands
057-010	twigs	1	V27	main sector	ep	38	M2-humified organic sands
057-010	twigs	1	V28	main sector	ep	38	M2-humified organic sands
057-011	charcoals	5	S28	main sector	mp	55	F4-hearth
057-011	grass stems	1	S28	main sector	mp	55	F4-hearth
057-012	charcoals	18.5	S25	main sector	lp	19	F1-pit
057-012	charcoals	18.5	T25	main sector	lp	19	F1-pit
057-012	barks	4	S25	main sector	lp	19	F1-pit
057-012	barks	4	T25	main sector	lp	19	F1-pit
057-012	fruits	4	S25	main sector	lp	19	F1-pit
057-012	fruits	4	T25	main sector	lp	19	F1-pit
057-012	twigs	1	S25	main sector	lp	19	F1-pit
057-012	twigs	1	T25	main sector	lp	19	F1-pit
057-013	charcoals	21	S29	main sector	mp	42	F4-hearth
057-014	charcoals	2	S30	main sector	mp	56	F4-hearth
057-014	grass stems	1	S30	main sector	mp	56	F4-hearth
057-014	fruits	2	S30	main sector	mp	56	F4-hearth
057-014	sticks	1	S30	main sector	mp	56	F4-hearth
057-014	roots	1	S30	main sector	mp	56	F4-hearth
057-015	leaves	0.4	U28	main sector	mp	9	M4-organic sand
057-015	leaves	0.4	U29	main sector	mp	9	M4-organic sand
057-015	leaves	0.4	U30	main sector	mp	9	M4-organic sand
057-015	leaves	0.4	V28	main sector	mp	9	M4-organic sand
057-015	leaves	0.4	V29	main sector	mp	9	M4-organic sand
057-015	fruits	1.4	U28	main sector	mp	9	M4-organic sand
057-015	fruits	1.4	U29	main sector	mp	9	M4-organic sand
057-015	fruits	1.4	U30	main sector	mp	9	M4-organic sand
057-015	fruits	1.4	V28	main sector	mp	9	M4-organic sand
057-015	fruits	1.4	V29	main sector	mp	9	M4-organic sand
057-015	sticks	0.4	U28	main sector	mp	9	M4-organic sand
057-015	sticks	0.4	U29	main sector	mp	9	M4-organic sand
057-015	sticks	0.4	U30	main sector	mp	9	M4-organic sand
057-015	sticks	0.4	V28	main sector	mp	9	M4-organic sand
057-015	sticks	0.4	V29	main sector	mp	9	M4-organic sand
057-016	charcoals	11	S28	main sector	mp	15	F5-ash dump
057-017	charcoals	6	T25	main sector	mp	49	F4-hearth
057-017	charcoals	6	U25	main sector	mp	49	F4-hearth
057-017	barks	0.5	T25	main sector	mp	49	F4-hearth
057-017	barks	0.5	U25	main sector	mp	49	F4-hearth
057-017	grass stems	1.5	T25	main sector	mp	49	F4-hearth
057-017	grass stems	1.5	U25	main sector	mp	49	F4-hearth
057-017	fruits	0.5	T25	main sector	mp	49	F4-hearth
057-017	fruits	0.5	U25	main sector	mp	49	F4-hearth
057-017	sticks	1	T25	main sector	mp	49	F4-hearth
057-017	sticks	1	U25	main sector	mp	49	F4-hearth
057-017	twigs	1	T25	main sector	mp	49	F4-hearth
057-017	twigs	1	U25	main sector	mp	49	F4-hearth
057-019	charcoals	2	S28	main sector	mp	43	F5-ash dump
057-019	grass stems	1	S28	main sector	mp	43	F5-ash dump
057-020	charcoals	19	U19	main sector	lp	26	F5-ash dump
057-020	fruits	2	U19	main sector	lp	26	F5-ash dump
057-020	sticks	1	U19	main sector	lp	26	F5-ash dump
057-020	twigs	1	U19	main sector	lp	26	F5-ash dump
057-021	charcoals	17	U30	main sector	ep	63	F4-hearth
057-021	barks	3	U30	main sector	ep	63	F4-hearth
057-021	grass stems	2	U30	main sector	ep	63	F4-hearth
057-021	fruits	5	U30	main sector	ep	63	F4-hearth
057-021	sticks	1	U30	main sector	ep	63	F4-hearth
057-021	twigs	5	U30	main sector	ep	63	F4-hearth
057-022	charcoals	0.5	S29	main sector	ep	57	F5-ash dump
057-022	charcoals	0.5	T29	main sector	ep	57	F5-ash dump
057-022	grass stems	0.5	S29	main sector	ep	57	F5-ash dump
057-022	grass stems	0.5	T29	main sector	ep	57	F5-ash dump
057-022	fruits	1	S29	main sector	ep	57	F5-ash dump
057-022	fruits	1	T29	main sector	ep	57	F5-ash dump
057-022	sticks	1	S29	main sector	ep	57	F5-ash dump
057-022	sticks	1	T29	main sector	ep	57	F5-ash dump
057-022	twigs	0.5	S29	main sector	ep	57	F5-ash dump
057-022	twigs	0.5	T29	main sector	ep	57	F5-ash dump
057-023	charcoals	14	S24	main sector	mp	28	F4-hearth
057-024	charcoals	2.5	U28	main sector	mp	25	M4-organic sand
057-024	charcoals	2.5	U29	main sector	mp	25	M4-organic sand
057-024	sticks	1	U28	main sector	mp	25	M4-organic sand
057-024	sticks	1	U29	main sector	mp	25	M4-organic sand
057-025	charcoals	9	U19	main sector	lp	26	F5-ash dump
057-025	barks	1	U19	main sector	lp	26	F5-ash dump
057-025	fruits	3	U19	main sector	lp	26	F5-ash dump
057-025	twigs	2	U19	main sector	lp	26	F5-ash dump
057-026	charcoals	6.5	S27	main sector	mp	45	F5-ash dump
057-026	charcoals	6.5	S28	main sector	mp	45	F5-ash dump
057-026	barks	1	S27	main sector	mp	45	F5-ash dump
057-026	barks	1	S28	main sector	mp	45	F5-ash dump
057-026	grass stems	1.5	S27	main sector	mp	45	F5-ash dump
057-026	grass stems	1.5	S28	main sector	mp	45	F5-ash dump
057-026	fruits	0.5	S27	main sector	mp	45	F5-ash dump
057-026	fruits	0.5	S28	main sector	mp	45	F5-ash dump
057-027	charcoals	25	S29	main sector	ep	59	F5-ash dump
057-027	fruits	1	S29	main sector	ep	59	F5-ash dump
057-027	sticks	1	S29	main sector	ep	59	F5-ash dump
057-027	twigs	1	S29	main sector	ep	59	F5-ash dump
057-028	charcoals	1.75	S28	main sector	ep	62	F1-pit
057-028	charcoals	1.75	S29	main sector	ep	62	F1-pit
057-028	charcoals	1.75	T28	main sector	ep	62	F1-pit
057-028	charcoals	1.75	T29	main sector	ep	62	F1-pit
057-029	charcoals	11	T26	main sector	lp	8	F4-hearth
057-029	barks	1	T26	main sector	lp	8	F4-hearth
057-029	sticks	1	T26	main sector	lp	8	F4-hearth
057-030	charcoals	3	T29	main sector	mp	47	F4-hearth
057-031	fruits	1	T27	main sector	lp	6	M7-dung
057-032	fruits	6	T26	main sector	lp	6	M7-dung
057-033	barks	1	T28	main sector	lp	6	M7-dung
057-033	grass stems	1	T28	main sector	lp	6	M7-dung
057-033	fruits	2	T28	main sector	lp	6	M7-dung
057-034	fruits	17	U26	main sector	lp	6	M7-dung
057-037	charcoals	22	U23	main sector	lp	5	F4-hearth
058-001	charcoals	16	S28	main sector	la	225	F4-hearth
058-001	barks	22	S28	main sector	la	225	F4-hearth
058-001	grass stems	11	S28	main sector	la	225	F4-hearth
058-001	fruits	3	S28	main sector	la	225	F4-hearth
058-001	sticks	16	S28	main sector	la	225	F4-hearth
058-001	twigs	7	S28	main sector	la	225	F4-hearth
058-002	charcoals	11	S27	main sector	la	225	F4-hearth
058-002	barks	11	S27	main sector	la	225	F4-hearth
058-002	grass stems	2	S27	main sector	la	225	F4-hearth
058-002	sticks	7	S27	main sector	la	225	F4-hearth
058-002	twigs	1	S27	main sector	la	225	F4-hearth
058-003	charcoals	7	V33	main sector	ep	38	M2-humified organic sands
058-003	fruits	1	V33	main sector	ep	38	M2-humified organic sands
058-003	sticks	1	V33	main sector	ep	38	M2-humified organic sands
058-004	grass stems	1	U31	main sector	la	293	M4-organic sand
058-004	fruits	1	U31	main sector	la	293	M4-organic sand
058-004	sticks	2	U31	main sector	la	293	M4-organic sand
058-005	charcoals	1	T32	main sector	la	132	M4-organic sand
058-005	sticks	1	T32	main sector	la	132	M4-organic sand
058-006	charcoals	9	T32	main sector	mp	246	F6-informal st. str.
058-006	barks	1	T32	main sector	mp	246	F6-informal st. str.
058-006	grass stems	1	T32	main sector	mp	246	F6-informal st. str.
058-006	fruits	7	T32	main sector	mp	246	F6-informal st. str.
058-006	sticks	1	T32	main sector	mp	246	F6-informal st. str.
058-007	charcoals	1	R31	main sector	la	132	M4-organic sand
058-007	twigs	3	R31	main sector	la	132	M4-organic sand
058-008	sticks	4	U31	main sector	la	103	M4-organic sand
058-008	twigs	2	U31	main sector	la	103	M4-organic sand
058-009	sticks	1	R33	main sector	la	103	M4-organic sand
058-010	barks	2	U32	main sector	la	297	M3-cemented organic sands
058-010	grass stems	1	U32	main sector	la	297	M3-cemented organic sands
058-010	sticks	3	U32	main sector	la	297	M3-cemented organic sands
058-011	barks	2	T32	main sector	ep	38	M2-humified organic sands
058-011	grass stems	3	T32	main sector	ep	38	M2-humified organic sands
058-011	fruits	5	T32	main sector	ep	38	M2-humified organic sands
058-011	sticks	1	T32	main sector	ep	38	M2-humified organic sands
058-011	twigs	1	T32	main sector	ep	38	M2-humified organic sands
058-012	charcoals	1	V32	main sector	ep	291	M5-stone line/accumulation
058-013	charcoals	1	S32	main sector	ep	38	M2-humified organic sands
058-013	barks	1	S32	main sector	ep	38	M2-humified organic sands
058-013	grass stems	4	S32	main sector	ep	38	M2-humified organic sands
058-013	fruits	3	S32	main sector	ep	38	M2-humified organic sands
058-013	sticks	5	S32	main sector	ep	38	M2-humified organic sands
058-013	twigs	4	S32	main sector	ep	38	M2-humified organic sands
058-014	charcoals	2.5	R31	main sector	la	267	F5-ash dump
058-014	charcoals	2.5	R32	main sector	la	267	F5-ash dump
058-014	charcoals	2.5	S31	main sector	la	267	F5-ash dump
058-014	charcoals	2.5	S32	main sector	la	267	F5-ash dump
058-014	charcoals	2.5	T31	main sector	la	267	F5-ash dump
058-014	charcoals	2.5	T32	main sector	la	267	F5-ash dump
058-014	barks	3.33333	R31	main sector	la	267	F5-ash dump
058-014	barks	3.33333	R32	main sector	la	267	F5-ash dump
058-014	barks	3.33333	S31	main sector	la	267	F5-ash dump
058-014	barks	3.33333	S32	main sector	la	267	F5-ash dump
058-014	barks	3.33333	T31	main sector	la	267	F5-ash dump
058-014	barks	3.33333	T32	main sector	la	267	F5-ash dump
058-014	grass stems	6	R31	main sector	la	267	F5-ash dump
058-014	grass stems	6	R32	main sector	la	267	F5-ash dump
058-014	grass stems	6	S31	main sector	la	267	F5-ash dump
058-014	grass stems	6	S32	main sector	la	267	F5-ash dump
058-014	grass stems	6	T31	main sector	la	267	F5-ash dump
058-014	grass stems	6	T32	main sector	la	267	F5-ash dump
058-014	fruits	2.66667	R31	main sector	la	267	F5-ash dump
058-014	fruits	2.66667	R32	main sector	la	267	F5-ash dump
058-014	fruits	2.66667	S31	main sector	la	267	F5-ash dump
058-014	fruits	2.66667	S32	main sector	la	267	F5-ash dump
058-014	fruits	2.66667	T31	main sector	la	267	F5-ash dump
058-014	fruits	2.66667	T32	main sector	la	267	F5-ash dump
058-014	sticks	3.33333	R31	main sector	la	267	F5-ash dump
058-014	sticks	3.33333	R32	main sector	la	267	F5-ash dump
058-014	sticks	3.33333	S31	main sector	la	267	F5-ash dump
058-014	sticks	3.33333	S32	main sector	la	267	F5-ash dump
058-014	sticks	3.33333	T31	main sector	la	267	F5-ash dump
058-014	sticks	3.33333	T32	main sector	la	267	F5-ash dump
058-014	twigs	3.33333	R31	main sector	la	267	F5-ash dump
058-014	twigs	3.33333	R32	main sector	la	267	F5-ash dump
058-014	twigs	3.33333	S31	main sector	la	267	F5-ash dump
058-014	twigs	3.33333	S32	main sector	la	267	F5-ash dump
058-014	twigs	3.33333	T31	main sector	la	267	F5-ash dump
058-014	twigs	3.33333	T32	main sector	la	267	F5-ash dump
058-015	charcoals	1	U32	main sector	ep	291	M5-stone line/accumulation
058-015	grass stems	1	U32	main sector	ep	291	M5-stone line/accumulation
058-016	charcoals	4	U31	main sector	la	156	M4-organic sand
058-016	barks	6	U31	main sector	la	156	M4-organic sand
058-016	grass stems	3	U31	main sector	la	156	M4-organic sand
058-016	fruits	3	U31	main sector	la	156	M4-organic sand
058-016	sticks	9	U31	main sector	la	156	M4-organic sand
058-016	twigs	8	U31	main sector	la	156	M4-organic sand
058-017	charcoals	2	U31	main sector	la	171	M5-stone line/accumulation
058-018	charcoals	9	U31	main sector	ep	281	M4-organic sand
058-018	barks	5	U31	main sector	ep	281	M4-organic sand
058-018	grass stems	5	U31	main sector	ep	281	M4-organic sand
058-018	fruits	2	U31	main sector	ep	281	M4-organic sand
058-018	sticks	6	U31	main sector	ep	281	M4-organic sand
058-018	twigs	2	U31	main sector	ep	281	M4-organic sand
058-019	charcoals	5	U32	main sector	la	293	M4-organic sand
058-019	barks	1	U32	main sector	la	293	M4-organic sand
058-020	charcoals	7	R33	main sector	ep	38	M2-humified organic sands
058-020	sticks	2	R33	main sector	ep	38	M2-humified organic sands
058-020	twigs	1	R33	main sector	ep	38	M2-humified organic sands
058-021	charcoals	3	R32	main sector	ep	38	M2-humified organic sands
058-021	barks	2	R32	main sector	ep	38	M2-humified organic sands
058-021	sticks	1	R32	main sector	ep	38	M2-humified organic sands
058-021	twigs	2	R32	main sector	ep	38	M2-humified organic sands
058-022	barks	3	S31	main sector	la	132	M4-organic sand
058-022	twigs	2	S31	main sector	la	132	M4-organic sand
058-023	charcoals	2	U31	main sector	ep	41	M4-organic sand
058-023	barks	4	U31	main sector	ep	41	M4-organic sand
058-023	fruits	4	U31	main sector	ep	41	M4-organic sand
058-023	sticks	1	U31	main sector	ep	41	M4-organic sand
058-023	twigs	1	U31	main sector	ep	41	M4-organic sand
058-024	charcoals	3	R33	main sector	la	103	M4-organic sand
058-024	barks	2	R33	main sector	la	103	M4-organic sand
058-024	sticks	2	R33	main sector	la	103	M4-organic sand
058-024	twigs	1	R33	main sector	la	103	M4-organic sand
058-025	charcoals	4	U31	main sector	ep	291	M5-stone line/accumulation
058-026	charcoals	3	T32	main sector	ep	38	M2-humified organic sands
058-026	barks	1	T32	main sector	ep	38	M2-humified organic sands
058-026	grass stems	1	T32	main sector	ep	38	M2-humified organic sands
058-027	charcoals	2	U27	main sector	la	199	M5-stone line/accumulation
058-028	charcoals	1	T31	main sector	la	103	M4-organic sand
058-028	twigs	1	T31	main sector	la	103	M4-organic sand
058-029	charcoals	2	V32	main sector	la	185	M5-stone line/accumulation
058-030	charcoals	5.5	R31	main sector	la	287	F5-ash dump
058-030	charcoals	5.5	R32	main sector	la	287	F5-ash dump
058-030	charcoals	5.5	S31	main sector	la	287	F5-ash dump
058-030	charcoals	5.5	S32	main sector	la	287	F5-ash dump
058-030	barks	3	R31	main sector	la	287	F5-ash dump
058-030	barks	3	R32	main sector	la	287	F5-ash dump
058-030	barks	3	S31	main sector	la	287	F5-ash dump
058-030	barks	3	S32	main sector	la	287	F5-ash dump
058-030	grass stems	2.75	R31	main sector	la	287	F5-ash dump
058-030	grass stems	2.75	R32	main sector	la	287	F5-ash dump
058-030	grass stems	2.75	S31	main sector	la	287	F5-ash dump
058-030	grass stems	2.75	S32	main sector	la	287	F5-ash dump
058-030	fruits	4.25	R31	main sector	la	287	F5-ash dump
058-030	fruits	4.25	R32	main sector	la	287	F5-ash dump
058-030	fruits	4.25	S31	main sector	la	287	F5-ash dump
058-030	fruits	4.25	S32	main sector	la	287	F5-ash dump
058-030	sticks	4.25	R31	main sector	la	287	F5-ash dump
058-030	sticks	4.25	R32	main sector	la	287	F5-ash dump
058-030	sticks	4.25	S31	main sector	la	287	F5-ash dump
058-030	sticks	4.25	S32	main sector	la	287	F5-ash dump
058-030	twigs	3.25	R31	main sector	la	287	F5-ash dump
058-030	twigs	3.25	R32	main sector	la	287	F5-ash dump
058-030	twigs	3.25	S31	main sector	la	287	F5-ash dump
058-030	twigs	3.25	S32	main sector	la	287	F5-ash dump
058-031	charcoals	9	Z29	main sector	la	199	M5-stone line/accumulation
058-032	charcoals	8	R33	main sector	la	294	F5-ash dump
058-032	grass stems	1	R33	main sector	la	294	F5-ash dump
058-032	twigs	1	R33	main sector	la	294	F5-ash dump
058-033	charcoals	6	V31	main sector	ep	291	M5-stone line/accumulation
058-034	barks	3	S31	main sector	ep	38	M2-humified organic sands
058-034	grass stems	2	S31	main sector	ep	38	M2-humified organic sands
058-034	sticks	2	S31	main sector	ep	38	M2-humified organic sands
058-035	charcoals	4	V31	main sector	la	293	M4-organic sand
058-035	sticks	2	V31	main sector	la	293	M4-organic sand
058-035	twigs	2	V31	main sector	la	293	M4-organic sand
058-036	charcoals	6	R30	main sector	la	156	M4-organic sand
058-036	barks	8	R30	main sector	la	156	M4-organic sand
058-036	grass stems	1	R30	main sector	la	156	M4-organic sand
058-036	fruits	2	R30	main sector	la	156	M4-organic sand
058-036	sticks	5	R30	main sector	la	156	M4-organic sand
058-037	charcoals	2	S31	main sector	la	156	M4-organic sand
058-037	barks	4	S31	main sector	la	156	M4-organic sand
058-037	sticks	6	S31	main sector	la	156	M4-organic sand
058-037	twigs	4	S31	main sector	la	156	M4-organic sand
058-038	barks	8	T33	main sector	ep	38	M2-humified organic sands
058-039	charcoals	1	R32	main sector	la	156	M4-organic sand
058-040	charcoals	7	U33	main sector	mp	246	F6-informal st. str.
058-040	fruits	3	U33	main sector	mp	246	F6-informal st. str.
058-041	charcoals	2	U32	main sector	la	185	M5-stone line/accumulation
058-041	sticks	2	U32	main sector	la	185	M5-stone line/accumulation
058-042	charcoals	2	S32	main sector	la	156	M4-organic sand
058-042	barks	6	S32	main sector	la	156	M4-organic sand
058-042	twigs	1	S32	main sector	la	156	M4-organic sand
058-043	charcoals	7	T32	main sector	ep	38	M2-humified organic sands
058-043	barks	14	T32	main sector	ep	38	M2-humified organic sands
058-043	grass stems	4	T32	main sector	ep	38	M2-humified organic sands
058-043	fruits	15	T32	main sector	ep	38	M2-humified organic sands
058-043	sticks	5	T32	main sector	ep	38	M2-humified organic sands
058-043	twigs	10	T32	main sector	ep	38	M2-humified organic sands
058-044	charcoals	16	S32	main sector	ep	38	M2-humified organic sands
058-044	barks	9	S32	main sector	ep	38	M2-humified organic sands
058-044	grass stems	28	S32	main sector	ep	38	M2-humified organic sands
058-044	fruits	15	S32	main sector	ep	38	M2-humified organic sands
058-044	sticks	10	S32	main sector	ep	38	M2-humified organic sands
058-044	twigs	4	S32	main sector	ep	38	M2-humified organic sands
058-045	charcoals	17	S29	main sector	la	225	F4-hearth
058-045	barks	12	S29	main sector	la	225	F4-hearth
058-045	grass stems	1	S29	main sector	la	225	F4-hearth
058-045	fruits	2	S29	main sector	la	225	F4-hearth
058-045	sticks	9	S29	main sector	la	225	F4-hearth
058-045	twigs	3	S29	main sector	la	225	F4-hearth
058-046	twigs	3	U31	main sector	la	103	M4-organic sand
058-047	charcoals	3	S32	main sector	la	156	M4-organic sand
058-047	barks	3	S32	main sector	la	156	M4-organic sand
058-047	grass stems	1	S32	main sector	la	156	M4-organic sand
058-047	fruits	1	S32	main sector	la	156	M4-organic sand
058-047	sticks	3	S32	main sector	la	156	M4-organic sand
058-047	twigs	4	S32	main sector	la	156	M4-organic sand
058-048	charcoals	2	T33	main sector	mp	246	F6-informal st. str.
058-048	barks	2	T33	main sector	mp	246	F6-informal st. str.
058-048	grass stems	1	T33	main sector	mp	246	F6-informal st. str.
058-048	fruits	1	T33	main sector	mp	246	F6-informal st. str.
058-048	sticks	2	T33	main sector	mp	246	F6-informal st. str.
058-048	twigs	2	T33	main sector	mp	246	F6-informal st. str.
058-049	charcoals	7	R33	main sector	ep	38	M2-humified organic sands
058-049	barks	2	R33	main sector	ep	38	M2-humified organic sands
058-049	fruits	4	R33	main sector	ep	38	M2-humified organic sands
058-049	sticks	1	R33	main sector	ep	38	M2-humified organic sands
058-049	twigs	2	R33	main sector	ep	38	M2-humified organic sands
058-050	charcoals	6	T31	main sector	la	156	M4-organic sand
058-050	barks	7	T31	main sector	la	156	M4-organic sand
058-050	grass stems	2	T31	main sector	la	156	M4-organic sand
058-050	fruits	3	T31	main sector	la	156	M4-organic sand
058-050	sticks	4	T31	main sector	la	156	M4-organic sand
058-050	twigs	5	T31	main sector	la	156	M4-organic sand
058-051	charcoals	1	V27	main sector	la	199	M5-stone line/accumulation
058-051	barks	3	V27	main sector	la	199	M5-stone line/accumulation
058-051	sticks	2	V27	main sector	la	199	M5-stone line/accumulation
058-052	charcoals	7	U32	main sector	la	185	M5-stone line/accumulation
058-053	barks	14	R22	main sector	la	251	F6-informal st. str.
058-053	fruits	1	R22	main sector	la	251	F6-informal st. str.
058-053	twigs	2	R22	main sector	la	251	F6-informal st. str.
058-054	charcoals	2	U32	main sector	ep	41	M4-organic sand
058-054	barks	14	U32	main sector	ep	41	M4-organic sand
058-054	grass stems	1	U32	main sector	ep	41	M4-organic sand
058-054	fruits	5	U32	main sector	ep	41	M4-organic sand
058-054	sticks	1	U32	main sector	ep	41	M4-organic sand
058-054	twigs	5	U32	main sector	ep	41	M4-organic sand
058-055	sticks	1	R31	main sector	la	287	F5-ash dump
058-056	fruits	1	U31	main sector	la	293	M4-organic sand
058-056	sticks	1	U31	main sector	la	293	M4-organic sand
058-057	barks	1	T33	main sector	ep	38	M2-humified organic sands
058-057	fruits	4	T33	main sector	ep	38	M2-humified organic sands
058-057	sticks	2	T33	main sector	ep	38	M2-humified organic sands
058-057	twigs	1	T33	main sector	ep	38	M2-humified organic sands
058-059	barks	1	U32	main sector	ep	38	M2-humified organic sands
058-059	grass stems	1	U32	main sector	ep	38	M2-humified organic sands
058-059	sticks	2	U32	main sector	ep	38	M2-humified organic sands
058-060	charcoals	2	S32	main sector	ep	38	M2-humified organic sands
058-060	barks	2	S32	main sector	ep	38	M2-humified organic sands
058-060	fruits	1	S32	main sector	ep	38	M2-humified organic sands
058-060	sticks	4	S32	main sector	ep	38	M2-humified organic sands
058-060	twigs	3	S32	main sector	ep	38	M2-humified organic sands
058-061	barks	2	T32	main sector	la	103	M4-organic sand
058-061	fruits	2	T32	main sector	la	103	M4-organic sand
058-061	sticks	4	T32	main sector	la	103	M4-organic sand
058-061	twigs	4	T32	main sector	la	103	M4-organic sand
058-062	charcoals	1	R33	main sector	la	156	M4-organic sand
058-062	barks	2	R33	main sector	la	156	M4-organic sand
058-062	fruits	1	R33	main sector	la	156	M4-organic sand
058-062	sticks	4	R33	main sector	la	156	M4-organic sand
058-062	twigs	2	R33	main sector	la	156	M4-organic sand
058-063	barks	1	T31	main sector	ep	38	M2-humified organic sands
058-063	fruits	1	T31	main sector	ep	38	M2-humified organic sands
058-063	sticks	3	T31	main sector	ep	38	M2-humified organic sands
058-064	barks	5	S32	main sector	la	156	M4-organic sand
058-064	twigs	2	S32	main sector	la	156	M4-organic sand
058-065	charcoals	3	U32	main sector	la	156	M4-organic sand
058-065	grass stems	2	U32	main sector	la	156	M4-organic sand
058-065	fruits	1	U32	main sector	la	156	M4-organic sand
058-065	twigs	1	U32	main sector	la	156	M4-organic sand
058-066	charcoals	5	T29	main sector	la	225	F4-hearth
058-066	barks	12	T29	main sector	la	225	F4-hearth
058-066	sticks	5	T29	main sector	la	225	F4-hearth
058-066	twigs	3	T29	main sector	la	225	F4-hearth
058-067	charcoals	3	T31	main sector	la	132	M4-organic sand
058-067	grass stems	1	T31	main sector	la	132	M4-organic sand
058-067	fruits	1	T31	main sector	la	132	M4-organic sand
058-067	sticks	2	T31	main sector	la	132	M4-organic sand
058-067	twigs	2	T31	main sector	la	132	M4-organic sand
058-068	charcoals	4	S31	main sector	la	132	M4-organic sand
058-068	barks	1	S31	main sector	la	132	M4-organic sand
058-069	charcoals	1	S31	main sector	la	103	M4-organic sand
058-069	fruits	1	S31	main sector	la	103	M4-organic sand
058-069	sticks	4	S31	main sector	la	103	M4-organic sand
058-070	charcoals	2	R32	main sector	la	156	M4-organic sand
058-070	fruits	1	R32	main sector	la	156	M4-organic sand
058-070	sticks	1	R32	main sector	la	156	M4-organic sand
058-071	grass stems	2	U31	main sector	la	156	M4-organic sand
058-071	fruits	2	U31	main sector	la	156	M4-organic sand
058-071	sticks	7	U31	main sector	la	156	M4-organic sand
058-071	twigs	6	U31	main sector	la	156	M4-organic sand
058-072	barks	1	T32	main sector	la	103	M4-organic sand
058-072	sticks	3	T32	main sector	la	103	M4-organic sand
058-073	charcoals	3	V32	main sector	ep	291	M5-stone line/accumulation
058-073	twigs	1	V32	main sector	ep	291	M5-stone line/accumulation
058-074	charcoals	1	R31	main sector	la	156	M4-organic sand
058-074	grass stems	1	R31	main sector	la	156	M4-organic sand
058-074	sticks	1	R31	main sector	la	156	M4-organic sand
058-074	twigs	1	R31	main sector	la	156	M4-organic sand
058-075	charcoals	2	S31	main sector	la	156	M4-organic sand
058-075	barks	4	S31	main sector	la	156	M4-organic sand
058-075	grass stems	1	S31	main sector	la	156	M4-organic sand
058-075	fruits	3	S31	main sector	la	156	M4-organic sand
058-075	sticks	3	S31	main sector	la	156	M4-organic sand
058-075	twigs	2	S31	main sector	la	156	M4-organic sand
058-076	charcoals	3	T31	main sector	la	156	M4-organic sand
058-076	barks	12	T31	main sector	la	156	M4-organic sand
058-076	grass stems	1	T31	main sector	la	156	M4-organic sand
058-076	fruits	1	T31	main sector	la	156	M4-organic sand
058-076	sticks	6	T31	main sector	la	156	M4-organic sand
058-076	twigs	5	T31	main sector	la	156	M4-organic sand
058-077	charcoals	1	S33	main sector	ep	270	F5-ash dump
058-077	barks	6	S33	main sector	ep	270	F5-ash dump
058-077	fruits	32	S33	main sector	ep	270	F5-ash dump
058-077	sticks	4	S33	main sector	ep	270	F5-ash dump
058-077	twigs	2	S33	main sector	ep	270	F5-ash dump
058-078	charcoals	5	V26	main sector	la	199	M5-stone line/accumulation
058-078	barks	2	V26	main sector	la	199	M5-stone line/accumulation
058-078	fruits	1	V26	main sector	la	199	M5-stone line/accumulation
058-078	twigs	1	V26	main sector	la	199	M5-stone line/accumulation
058-079	charcoals	3	S32	main sector	la	103	M4-organic sand
058-079	barks	5	S32	main sector	la	103	M4-organic sand
058-079	grass stems	1	S32	main sector	la	103	M4-organic sand
058-079	sticks	4	S32	main sector	la	103	M4-organic sand
058-079	twigs	7	S32	main sector	la	103	M4-organic sand
058-080	charcoals	1	U31	main sector	ep	38	M2-humified organic sands
058-080	grass stems	1	U31	main sector	ep	38	M2-humified organic sands
058-080	fruits	3	U31	main sector	ep	38	M2-humified organic sands
058-081	charcoals	6	T32	main sector	la	156	M4-organic sand
058-081	barks	9	T32	main sector	la	156	M4-organic sand
058-081	sticks	2	T32	main sector	la	156	M4-organic sand
058-081	twigs	2	T32	main sector	la	156	M4-organic sand
058-082	charcoals	13	V31	main sector	la	185	M5-stone line/accumulation
058-083	charcoals	3	T22	main sector	la	178	M4-organic sand
058-083	barks	19	T22	main sector	la	178	M4-organic sand
058-083	grass stems	1	T22	main sector	la	178	M4-organic sand
058-083	sticks	7	T22	main sector	la	178	M4-organic sand
058-083	twigs	2	T22	main sector	la	178	M4-organic sand
058-084	charcoals	5	R32	main sector	la	156	M4-organic sand
058-084	barks	4	R32	main sector	la	156	M4-organic sand
058-084	sticks	5	R32	main sector	la	156	M4-organic sand
058-084	twigs	2	R32	main sector	la	156	M4-organic sand
058-085	charcoals	1	S33	main sector	ep	38	M2-humified organic sands
058-085	barks	7	S33	main sector	ep	38	M2-humified organic sands
058-085	grass stems	9	S33	main sector	ep	38	M2-humified organic sands
058-085	fruits	17	S33	main sector	ep	38	M2-humified organic sands
058-085	sticks	9	S33	main sector	ep	38	M2-humified organic sands
058-085	twigs	4	S33	main sector	ep	38	M2-humified organic sands
058-086	charcoals	6	S32	main sector	la	132	M4-organic sand
058-086	barks	5	S32	main sector	la	132	M4-organic sand
058-086	grass stems	4	S32	main sector	la	132	M4-organic sand
058-086	fruits	1	S32	main sector	la	132	M4-organic sand
058-086	sticks	4	S32	main sector	la	132	M4-organic sand
058-086	twigs	6	S32	main sector	la	132	M4-organic sand
058-087	charcoals	6	R32	main sector	la	132	M4-organic sand
058-087	grass stems	7	R32	main sector	la	132	M4-organic sand
058-087	fruits	3	R32	main sector	la	132	M4-organic sand
058-087	sticks	1	R32	main sector	la	132	M4-organic sand
058-087	twigs	3	R32	main sector	la	132	M4-organic sand
058-088	charcoals	4	T32	main sector	ep	38	M2-humified organic sands
058-088	barks	3	T32	main sector	ep	38	M2-humified organic sands
058-088	grass stems	2	T32	main sector	ep	38	M2-humified organic sands
058-088	fruits	7	T32	main sector	ep	38	M2-humified organic sands
058-088	sticks	6	T32	main sector	ep	38	M2-humified organic sands
058-088	twigs	7	T32	main sector	ep	38	M2-humified organic sands
058-089	charcoals	3	T32	main sector	la	156	M4-organic sand
058-089	barks	2	T32	main sector	la	156	M4-organic sand
058-089	fruits	1	T32	main sector	la	156	M4-organic sand
058-089	sticks	7	T32	main sector	la	156	M4-organic sand
058-089	twigs	4	T32	main sector	la	156	M4-organic sand
058-090	charcoals	8	R32	main sector	la	156	M4-organic sand
058-090	barks	11	R32	main sector	la	156	M4-organic sand
058-090	grass stems	3	R32	main sector	la	156	M4-organic sand
058-090	fruits	3	R32	main sector	la	156	M4-organic sand
058-090	sticks	3	R32	main sector	la	156	M4-organic sand
058-090	twigs	1	R32	main sector	la	156	M4-organic sand
058-091	charcoals	3	R31	main sector	ep	38	M2-humified organic sands
058-091	barks	1	R31	main sector	ep	38	M2-humified organic sands
058-091	fruits	1	R31	main sector	ep	38	M2-humified organic sands
058-091	sticks	5	R31	main sector	ep	38	M2-humified organic sands
058-091	twigs	1	R31	main sector	ep	38	M2-humified organic sands
058-092	charcoals	0.5	R31	main sector	la	287	F5-ash dump
058-092	charcoals	0.5	S31	main sector	la	287	F5-ash dump
058-092	barks	1	R31	main sector	la	287	F5-ash dump
058-092	barks	1	S31	main sector	la	287	F5-ash dump
058-092	grass stems	2.5	R31	main sector	la	287	F5-ash dump
058-092	grass stems	2.5	S31	main sector	la	287	F5-ash dump
058-092	fruits	0.5	R31	main sector	la	287	F5-ash dump
058-092	fruits	0.5	S31	main sector	la	287	F5-ash dump
058-092	sticks	1.5	R31	main sector	la	287	F5-ash dump
058-092	sticks	1.5	S31	main sector	la	287	F5-ash dump
058-092	twigs	1.5	R31	main sector	la	287	F5-ash dump
058-092	twigs	1.5	S31	main sector	la	287	F5-ash dump
058-093	barks	1	S32	main sector	ep	285	M6-straw
058-093	grass stems	6	S32	main sector	ep	285	M6-straw
058-093	fruits	1	S32	main sector	ep	285	M6-straw
058-093	twigs	5	S32	main sector	ep	285	M6-straw
058-094	grass stems	1	U31	main sector	la	293	M4-organic sand
058-094	fruits	1	U31	main sector	la	293	M4-organic sand
058-094	sticks	2	U31	main sector	la	293	M4-organic sand
059-001	charcoals	8	U32	main sector	ep	281	M4-organic sand
059-001	barks	6	U32	main sector	ep	281	M4-organic sand
059-001	grass stems	8	U32	main sector	ep	281	M4-organic sand
059-001	fruits	6	U32	main sector	ep	281	M4-organic sand
059-001	sticks	10	U32	main sector	ep	281	M4-organic sand
059-001	twigs	4	U32	main sector	ep	281	M4-organic sand
059-002	charcoals	2	V32	main sector	ep	239	M4-organic sand
059-002	barks	6	V32	main sector	ep	239	M4-organic sand
059-002	grass stems	1	V32	main sector	ep	239	M4-organic sand
059-002	fruits	7	V32	main sector	ep	239	M4-organic sand
059-002	sticks	2	V32	main sector	ep	239	M4-organic sand
059-002	twigs	4	V32	main sector	ep	239	M4-organic sand
059-003	charcoals	11	V26	main sector	la	185	M5-stone line/accumulation
059-003	barks	3	V26	main sector	la	185	M5-stone line/accumulation
059-003	grass stems	1	V26	main sector	la	185	M5-stone line/accumulation
059-004	charcoals	0.25	T32	main sector	mp	246	F6-informal st. str.
059-004	charcoals	0.25	T33	main sector	mp	246	F6-informal st. str.
059-004	charcoals	0.25	U32	main sector	mp	246	F6-informal st. str.
059-004	charcoals	0.25	U33	main sector	mp	246	F6-informal st. str.
059-004	barks	0.75	T32	main sector	mp	246	F6-informal st. str.
059-004	barks	0.75	T33	main sector	mp	246	F6-informal st. str.
059-004	barks	0.75	U32	main sector	mp	246	F6-informal st. str.
059-004	barks	0.75	U33	main sector	mp	246	F6-informal st. str.
059-004	fruits	0.25	T32	main sector	mp	246	F6-informal st. str.
059-004	fruits	0.25	T33	main sector	mp	246	F6-informal st. str.
059-004	fruits	0.25	U32	main sector	mp	246	F6-informal st. str.
059-004	fruits	0.25	U33	main sector	mp	246	F6-informal st. str.
059-004	sticks	0.5	T32	main sector	mp	246	F6-informal st. str.
059-004	sticks	0.5	T33	main sector	mp	246	F6-informal st. str.
059-004	sticks	0.5	U32	main sector	mp	246	F6-informal st. str.
059-004	sticks	0.5	U33	main sector	mp	246	F6-informal st. str.
059-005	charcoals	1.75	T32	main sector	mp	246	F6-informal st. str.
059-005	charcoals	1.75	T33	main sector	mp	246	F6-informal st. str.
059-005	charcoals	1.75	U32	main sector	mp	246	F6-informal st. str.
059-005	charcoals	1.75	U33	main sector	mp	246	F6-informal st. str.
059-005	barks	1	T32	main sector	mp	246	F6-informal st. str.
059-005	barks	1	T33	main sector	mp	246	F6-informal st. str.
059-005	barks	1	U32	main sector	mp	246	F6-informal st. str.
059-005	barks	1	U33	main sector	mp	246	F6-informal st. str.
059-005	sticks	0.75	T32	main sector	mp	246	F6-informal st. str.
059-005	sticks	0.75	T33	main sector	mp	246	F6-informal st. str.
059-005	sticks	0.75	U32	main sector	mp	246	F6-informal st. str.
059-005	sticks	0.75	U33	main sector	mp	246	F6-informal st. str.
059-005	twigs	0.25	T32	main sector	mp	246	F6-informal st. str.
059-005	twigs	0.25	T33	main sector	mp	246	F6-informal st. str.
059-005	twigs	0.25	U32	main sector	mp	246	F6-informal st. str.
059-005	twigs	0.25	U33	main sector	mp	246	F6-informal st. str.
059-006	charcoals	12	T31	main sector	ep	41	M4-organic sand
059-006	barks	18	T31	main sector	ep	41	M4-organic sand
059-006	grass stems	7	T31	main sector	ep	41	M4-organic sand
059-006	fruits	14	T31	main sector	ep	41	M4-organic sand
059-006	twigs	8	T31	main sector	ep	41	M4-organic sand
059-007	charcoals	17	V33	main sector	ep	239	M4-organic sand
059-007	barks	7	V33	main sector	ep	239	M4-organic sand
059-007	grass stems	2	V33	main sector	ep	239	M4-organic sand
059-007	fruits	4	V33	main sector	ep	239	M4-organic sand
059-007	sticks	5	V33	main sector	ep	239	M4-organic sand
059-008	charcoals	2	T33	main sector	ep	38	M2-humified organic sands
059-008	fruits	8	T33	main sector	ep	38	M2-humified organic sands
059-008	sticks	1	T33	main sector	ep	38	M2-humified organic sands
059-008	twigs	1	T33	main sector	ep	38	M2-humified organic sands
059-008	seeds	1	T33	main sector	ep	38	M2-humified organic sands
059-009	charcoals	3	T31	main sector	la	267	F5-ash dump
059-009	barks	8	T31	main sector	la	267	F5-ash dump
059-009	fruits	4	T31	main sector	la	267	F5-ash dump
059-009	sticks	7	T31	main sector	la	267	F5-ash dump
059-010	barks	3	R26	main sector	la	132	M4-organic sand
059-010	fruits	6	R26	main sector	la	132	M4-organic sand
059-010	twigs	2	R26	main sector	la	132	M4-organic sand
059-011	charcoals	1	R23	main sector	la	275	M6-straw
059-011	barks	21	R23	main sector	la	275	M6-straw
059-011	grass stems	1	R23	main sector	la	275	M6-straw
059-011	fruits	3	R23	main sector	la	275	M6-straw
059-011	sticks	2	R23	main sector	la	275	M6-straw
059-011	twigs	5	R23	main sector	la	275	M6-straw
059-012	charcoals	10	T31	main sector	la	267	F5-ash dump
059-012	barks	8	T31	main sector	la	267	F5-ash dump
059-012	grass stems	3	T31	main sector	la	267	F5-ash dump
059-012	fruits	7	T31	main sector	la	267	F5-ash dump
059-012	sticks	3	T31	main sector	la	267	F5-ash dump
059-012	twigs	8	T31	main sector	la	267	F5-ash dump
059-013	barks	1	R31	main sector	ep	41	M4-organic sand
059-013	sticks	1	R31	main sector	ep	41	M4-organic sand
059-014	barks	9	R24	main sector	la	132	M4-organic sand
059-014	twigs	1	R24	main sector	la	132	M4-organic sand
059-015	charcoals	2	U32	main sector	ep	41	M4-organic sand
059-015	barks	2	U32	main sector	ep	41	M4-organic sand
059-015	grass stems	1	U32	main sector	ep	41	M4-organic sand
059-015	fruits	2	U32	main sector	ep	41	M4-organic sand
059-016	barks	3	R23	main sector	la	132	M4-organic sand
059-016	twigs	3	R23	main sector	la	132	M4-organic sand
059-017	barks	2	R33	main sector	ep	250	M7-dung
059-017	fruits	5	R33	main sector	ep	250	M7-dung
059-018	charcoals	10	U31	main sector	ep	281	M4-organic sand
059-018	barks	5	U31	main sector	ep	281	M4-organic sand
059-018	grass stems	4	U31	main sector	ep	281	M4-organic sand
059-018	fruits	15	U31	main sector	ep	281	M4-organic sand
059-018	sticks	3	U31	main sector	ep	281	M4-organic sand
059-018	twigs	2	U31	main sector	ep	281	M4-organic sand
059-019	charcoals	10	R25	main sector	la	195	M4-organic sand
059-019	barks	11	R25	main sector	la	195	M4-organic sand
059-019	grass stems	3	R25	main sector	la	195	M4-organic sand
059-019	fruits	3	R25	main sector	la	195	M4-organic sand
059-020	barks	6	S23	main sector	la	275	M6-straw
059-020	sticks	1	S23	main sector	la	275	M6-straw
059-021	barks	14	R26	main sector	la	132	M4-organic sand
059-022	fruits	3	S31	main sector	ep	41	M4-organic sand
059-022	twigs	1	S31	main sector	ep	41	M4-organic sand
059-023	barks	19	R33	main sector	la	275	M6-straw
059-023	sticks	4	R33	main sector	la	275	M6-straw
059-023	twigs	4	R33	main sector	la	275	M6-straw
059-024	charcoals	1	U32	main sector	mp	246	F6-informal st. str.
059-025	charcoals	16	T33	main sector	ep	41	M4-organic sand
059-025	barks	24	T33	main sector	ep	41	M4-organic sand
059-025	grass stems	21	T33	main sector	ep	41	M4-organic sand
059-025	fruits	13	T33	main sector	ep	41	M4-organic sand
059-025	sticks	7	T33	main sector	ep	41	M4-organic sand
059-025	twigs	8	T33	main sector	ep	41	M4-organic sand
059-026	barks	2	T34	main sector	ep	41	M4-organic sand
059-026	sticks	1	T34	main sector	ep	41	M4-organic sand
059-026	roots	1	T34	main sector	ep	41	M4-organic sand
059-026	twigs	1	T34	main sector	ep	41	M4-organic sand
059-027	charcoals	1	R22	main sector	la	96	M4-organic sand
059-027	barks	7	R22	main sector	la	96	M4-organic sand
059-027	grass stems	1	R22	main sector	la	96	M4-organic sand
059-027	fruits	3	R22	main sector	la	96	M4-organic sand
059-028	charcoals	3	V32	main sector	ep	239	M4-organic sand
059-028	fruits	4	V32	main sector	ep	239	M4-organic sand
059-028	twigs	1	V32	main sector	ep	239	M4-organic sand
059-029	charcoals	1	U32	main sector	la	103	M4-organic sand
059-029	twigs	8	U32	main sector	la	103	M4-organic sand
059-030	barks	13	R23	main sector	la	96	M4-organic sand
059-030	grass stems	1	R23	main sector	la	96	M4-organic sand
059-030	fruits	1	R23	main sector	la	96	M4-organic sand
059-031	charcoals	13	R26	main sector	la	132	M4-organic sand
059-031	barks	28	R26	main sector	la	132	M4-organic sand
059-031	grass stems	20	R26	main sector	la	132	M4-organic sand
059-031	fruits	5	R26	main sector	la	132	M4-organic sand
059-031	sticks	12	R26	main sector	la	132	M4-organic sand
059-031	twigs	13	R26	main sector	la	132	M4-organic sand
059-032	charcoals	19	U33	main sector	mp	25	M4-organic sand
059-032	barks	12	U33	main sector	mp	25	M4-organic sand
059-032	grass stems	3	U33	main sector	mp	25	M4-organic sand
059-032	fruits	5	U33	main sector	mp	25	M4-organic sand
059-032	sticks	8	U33	main sector	mp	25	M4-organic sand
059-032	twigs	6	U33	main sector	mp	25	M4-organic sand
059-033	charcoals	5	R24	main sector	la	275	M6-straw
059-033	barks	17	R24	main sector	la	275	M6-straw
059-033	sticks	3	R24	main sector	la	275	M6-straw
059-033	twigs	5	R24	main sector	la	275	M6-straw
059-034	charcoals	2	R27	main sector	la	132	M4-organic sand
059-034	barks	15	R27	main sector	la	132	M4-organic sand
059-034	grass stems	3	R27	main sector	la	132	M4-organic sand
059-034	sticks	7	R27	main sector	la	132	M4-organic sand
059-034	twigs	4	R27	main sector	la	132	M4-organic sand
059-035	barks	21	R22	main sector	la	96	M4-organic sand
059-035	grass stems	2	R22	main sector	la	96	M4-organic sand
059-035	fruits	1	R22	main sector	la	96	M4-organic sand
059-035	sticks	1	R22	main sector	la	96	M4-organic sand
059-035	twigs	2	R22	main sector	la	96	M4-organic sand
059-036	charcoals	8	R32	main sector	ep	41	M4-organic sand
059-036	barks	5	R32	main sector	ep	41	M4-organic sand
059-036	grass stems	3	R32	main sector	ep	41	M4-organic sand
059-036	fruits	4	R32	main sector	ep	41	M4-organic sand
059-036	sticks	1	R32	main sector	ep	41	M4-organic sand
059-036	twigs	5	R32	main sector	ep	41	M4-organic sand
059-037	charcoals	3	R33	main sector	ep	41	M4-organic sand
059-037	barks	6	R33	main sector	ep	41	M4-organic sand
059-037	grass stems	1	R33	main sector	ep	41	M4-organic sand
059-037	fruits	11	R33	main sector	ep	41	M4-organic sand
059-037	sticks	7	R33	main sector	ep	41	M4-organic sand
059-037	twigs	2	R33	main sector	ep	41	M4-organic sand
059-038	charcoals	10	U33	main sector	ep	41	M4-organic sand
059-038	barks	14	U33	main sector	ep	41	M4-organic sand
059-038	fruits	5	U33	main sector	ep	41	M4-organic sand
059-038	sticks	1	U33	main sector	ep	41	M4-organic sand
059-038	twigs	4	U33	main sector	ep	41	M4-organic sand
059-039	charcoals	12	T32	main sector	ep	41	M4-organic sand
059-039	fruits	1	T32	main sector	ep	41	M4-organic sand
059-039	sticks	4	T32	main sector	ep	41	M4-organic sand
059-040	barks	4	S27	main sector	la	225	F4-hearth
059-040	sticks	2	S27	main sector	la	225	F4-hearth
059-040	twigs	1	S27	main sector	la	225	F4-hearth
059-041	charcoals	3	S33	main sector	ep	41	M4-organic sand
059-041	barks	14	S33	main sector	ep	41	M4-organic sand
059-041	grass stems	5	S33	main sector	ep	41	M4-organic sand
059-041	fruits	32	S33	main sector	ep	41	M4-organic sand
059-041	sticks	2	S33	main sector	ep	41	M4-organic sand
059-041	roots	3	S33	main sector	ep	41	M4-organic sand
059-041	twigs	2	S33	main sector	ep	41	M4-organic sand
059-042	fruits	1	V32	main sector	ep	239	M4-organic sand
059-042	sticks	1	V32	main sector	ep	239	M4-organic sand
059-043	charcoals	1	T32	main sector	ep	41	M4-organic sand
059-043	barks	8	T32	main sector	ep	41	M4-organic sand
059-043	grass stems	3	T32	main sector	ep	41	M4-organic sand
059-043	fruits	3	T32	main sector	ep	41	M4-organic sand
059-043	sticks	4	T32	main sector	ep	41	M4-organic sand
059-044	charcoals	5	U32	main sector	ep	41	M4-organic sand
059-044	barks	4	U32	main sector	ep	41	M4-organic sand
059-045	charcoals	1	S33	main sector	ep	269	F1-pit
059-045	fruits	5	S33	main sector	ep	269	F1-pit
059-046	charcoals	3	S33	main sector	ep	41	M4-organic sand
059-046	fruits	2	S33	main sector	ep	41	M4-organic sand
059-046	sticks	1	S33	main sector	ep	41	M4-organic sand
059-046	twigs	2	S33	main sector	ep	41	M4-organic sand
059-047	charcoals	9	T31	main sector	ep	41	M4-organic sand
059-047	barks	5	T31	main sector	ep	41	M4-organic sand
059-047	grass stems	10	T31	main sector	ep	41	M4-organic sand
059-047	fruits	11	T31	main sector	ep	41	M4-organic sand
059-047	sticks	4	T31	main sector	ep	41	M4-organic sand
059-047	twigs	11	T31	main sector	ep	41	M4-organic sand
059-047	seeds	1	T31	main sector	ep	41	M4-organic sand
059-048	barks	6	U31	main sector	ep	41	M4-organic sand
059-048	grass stems	1	U31	main sector	ep	41	M4-organic sand
059-048	fruits	4	U31	main sector	ep	41	M4-organic sand
059-048	sticks	4	U31	main sector	ep	41	M4-organic sand
059-048	twigs	1	U31	main sector	ep	41	M4-organic sand
059-049	charcoals	2	U33	main sector	ep	281	M4-organic sand
059-049	barks	2	U33	main sector	ep	281	M4-organic sand
059-049	fruits	3	U33	main sector	ep	281	M4-organic sand
059-049	twigs	1	U33	main sector	ep	281	M4-organic sand
059-050	fruits	1	R33	main sector	ep	41	M4-organic sand
059-051	charcoals	6	U32	main sector	ep	286	M4-organic sand
059-051	barks	6	U32	main sector	ep	286	M4-organic sand
059-051	fruits	9	U32	main sector	ep	286	M4-organic sand
059-051	twigs	1	U32	main sector	ep	286	M4-organic sand
059-051	seeds	1	U32	main sector	ep	286	M4-organic sand
059-052	charcoals	4	V32	main sector	ep	239	M4-organic sand
059-052	barks	3	V32	main sector	ep	239	M4-organic sand
059-052	grass stems	1	V32	main sector	ep	239	M4-organic sand
059-052	fruits	4	V32	main sector	ep	239	M4-organic sand
059-052	twigs	2	V32	main sector	ep	239	M4-organic sand
059-053	barks	10	R33	main sector	la	132	M4-organic sand
059-053	grass stems	2	R33	main sector	la	132	M4-organic sand
059-053	twigs	1	R33	main sector	la	132	M4-organic sand
059-054	charcoals	4	T33	main sector	ep	41	M4-organic sand
059-054	barks	3	T33	main sector	ep	41	M4-organic sand
059-054	fruits	1	T33	main sector	ep	41	M4-organic sand
059-054	sticks	1	T33	main sector	ep	41	M4-organic sand
059-054	twigs	2	T33	main sector	ep	41	M4-organic sand
059-055	charcoals	6.5	T32	main sector	mp	246	F6-informal st. str.
059-055	charcoals	6.5	T33	main sector	mp	246	F6-informal st. str.
059-055	charcoals	6.5	U32	main sector	mp	246	F6-informal st. str.
059-055	charcoals	6.5	U33	main sector	mp	246	F6-informal st. str.
059-055	barks	3	T32	main sector	mp	246	F6-informal st. str.
059-055	barks	3	T33	main sector	mp	246	F6-informal st. str.
059-055	barks	3	U32	main sector	mp	246	F6-informal st. str.
059-055	barks	3	U33	main sector	mp	246	F6-informal st. str.
059-055	grass stems	0.5	T32	main sector	mp	246	F6-informal st. str.
059-055	grass stems	0.5	T33	main sector	mp	246	F6-informal st. str.
059-055	grass stems	0.5	U32	main sector	mp	246	F6-informal st. str.
059-055	grass stems	0.5	U33	main sector	mp	246	F6-informal st. str.
059-055	fruits	5	T32	main sector	mp	246	F6-informal st. str.
059-055	fruits	5	T33	main sector	mp	246	F6-informal st. str.
059-055	fruits	5	U32	main sector	mp	246	F6-informal st. str.
059-055	fruits	5	U33	main sector	mp	246	F6-informal st. str.
059-055	sticks	1.75	T32	main sector	mp	246	F6-informal st. str.
059-055	sticks	1.75	T33	main sector	mp	246	F6-informal st. str.
059-055	sticks	1.75	U32	main sector	mp	246	F6-informal st. str.
059-055	sticks	1.75	U33	main sector	mp	246	F6-informal st. str.
059-055	twigs	0.5	T32	main sector	mp	246	F6-informal st. str.
059-055	twigs	0.5	T33	main sector	mp	246	F6-informal st. str.
059-055	twigs	0.5	U32	main sector	mp	246	F6-informal st. str.
059-055	twigs	0.5	U33	main sector	mp	246	F6-informal st. str.
059-056	charcoals	2	U31	main sector	ep	284	M8-floor
059-056	grass stems	6	U31	main sector	ep	284	M8-floor
059-056	fruits	4	U31	main sector	ep	284	M8-floor
059-056	twigs	1	U31	main sector	ep	284	M8-floor
059-057	charcoals	2	R22	main sector	la	275	M6-straw
059-057	barks	32	R22	main sector	la	275	M6-straw
059-057	grass stems	2	R22	main sector	la	275	M6-straw
059-057	sticks	10	R22	main sector	la	275	M6-straw
059-057	twigs	10	R22	main sector	la	275	M6-straw
059-059	charcoals	5	T33	main sector	ep	41	M4-organic sand
059-059	barks	2	T33	main sector	ep	41	M4-organic sand
059-059	fruits	5	T33	main sector	ep	41	M4-organic sand
059-059	sticks	4	T33	main sector	ep	41	M4-organic sand
059-060	charcoals	2	R24	main sector	la	258	F5-ash dump
059-061	charcoals	1	S22	main sector	la	275	M6-straw
059-061	barks	9	S22	main sector	la	275	M6-straw
059-061	sticks	1	S22	main sector	la	275	M6-straw
059-061	twigs	1	S22	main sector	la	275	M6-straw
059-062	charcoals	9	U33	main sector	ep	41	M4-organic sand
059-062	barks	9	U33	main sector	ep	41	M4-organic sand
059-062	grass stems	1	U33	main sector	ep	41	M4-organic sand
059-062	fruits	14	U33	main sector	ep	41	M4-organic sand
059-062	sticks	3	U33	main sector	ep	41	M4-organic sand
059-062	twigs	3	U33	main sector	ep	41	M4-organic sand
059-064	charcoals	1	S32	main sector	ep	41	M4-organic sand
059-064	barks	6	S32	main sector	ep	41	M4-organic sand
059-064	grass stems	2	S32	main sector	ep	41	M4-organic sand
059-064	fruits	5	S32	main sector	ep	41	M4-organic sand
059-064	twigs	1	S32	main sector	ep	41	M4-organic sand
059-065	charcoals	4	S33	main sector	ep	41	M4-organic sand
059-065	barks	17	S33	main sector	ep	41	M4-organic sand
059-065	grass stems	3	S33	main sector	ep	41	M4-organic sand
059-065	fruits	4	S33	main sector	ep	41	M4-organic sand
059-065	twigs	7	S33	main sector	ep	41	M4-organic sand
059-066	charcoals	4	U34	main sector	ep	239	M4-organic sand
059-067	charcoals	3	R23	main sector	la	266	F4-hearth
059-067	barks	3	R23	main sector	la	266	F4-hearth
059-067	fruits	1	R23	main sector	la	266	F4-hearth
059-067	sticks	3	R23	main sector	la	266	F4-hearth
059-067	twigs	1	R23	main sector	la	266	F4-hearth
059-068	charcoals	1.33333	R31	main sector	la	267	F5-ash dump
059-068	charcoals	1.33333	R32	main sector	la	267	F5-ash dump
059-068	charcoals	1.33333	S31	main sector	la	267	F5-ash dump
059-068	charcoals	1.33333	S32	main sector	la	267	F5-ash dump
059-068	charcoals	1.33333	T31	main sector	la	267	F5-ash dump
059-068	charcoals	1.33333	T32	main sector	la	267	F5-ash dump
059-068	barks	2.16667	R31	main sector	la	267	F5-ash dump
059-068	barks	2.16667	R32	main sector	la	267	F5-ash dump
059-068	barks	2.16667	S31	main sector	la	267	F5-ash dump
059-068	barks	2.16667	S32	main sector	la	267	F5-ash dump
059-068	barks	2.16667	T31	main sector	la	267	F5-ash dump
059-068	barks	2.16667	T32	main sector	la	267	F5-ash dump
059-068	grass stems	1.16667	R31	main sector	la	267	F5-ash dump
059-068	grass stems	1.16667	R32	main sector	la	267	F5-ash dump
059-068	grass stems	1.16667	S31	main sector	la	267	F5-ash dump
059-068	grass stems	1.16667	S32	main sector	la	267	F5-ash dump
059-068	grass stems	1.16667	T31	main sector	la	267	F5-ash dump
059-068	grass stems	1.16667	T32	main sector	la	267	F5-ash dump
059-068	fruits	3.33333	R31	main sector	la	267	F5-ash dump
059-068	fruits	3.33333	R32	main sector	la	267	F5-ash dump
059-068	fruits	3.33333	S31	main sector	la	267	F5-ash dump
059-068	fruits	3.33333	S32	main sector	la	267	F5-ash dump
059-068	fruits	3.33333	T31	main sector	la	267	F5-ash dump
059-068	fruits	3.33333	T32	main sector	la	267	F5-ash dump
059-068	sticks	1.16667	R31	main sector	la	267	F5-ash dump
059-068	sticks	1.16667	R32	main sector	la	267	F5-ash dump
059-068	sticks	1.16667	S31	main sector	la	267	F5-ash dump
059-068	sticks	1.16667	S32	main sector	la	267	F5-ash dump
059-068	sticks	1.16667	T31	main sector	la	267	F5-ash dump
059-068	sticks	1.16667	T32	main sector	la	267	F5-ash dump
059-068	twigs	0.333333	R31	main sector	la	267	F5-ash dump
059-068	twigs	0.333333	R32	main sector	la	267	F5-ash dump
059-068	twigs	0.333333	S31	main sector	la	267	F5-ash dump
059-068	twigs	0.333333	S32	main sector	la	267	F5-ash dump
059-068	twigs	0.333333	T31	main sector	la	267	F5-ash dump
059-068	twigs	0.333333	T32	main sector	la	267	F5-ash dump
059-068	seeds	0.166667	R31	main sector	la	267	F5-ash dump
059-068	seeds	0.166667	R32	main sector	la	267	F5-ash dump
059-068	seeds	0.166667	S31	main sector	la	267	F5-ash dump
059-068	seeds	0.166667	S32	main sector	la	267	F5-ash dump
059-068	seeds	0.166667	T31	main sector	la	267	F5-ash dump
059-068	seeds	0.166667	T32	main sector	la	267	F5-ash dump
059-069	charcoals	4	R23	main sector	la	132	M4-organic sand
059-069	barks	21	R23	main sector	la	132	M4-organic sand
059-069	leaves	1	R23	main sector	la	132	M4-organic sand
059-069	fruits	1	R23	main sector	la	132	M4-organic sand
059-069	sticks	6	R23	main sector	la	132	M4-organic sand
059-069	twigs	3	R23	main sector	la	132	M4-organic sand
059-070	charcoals	1	V33	main sector	mp	25	M4-organic sand
059-070	sticks	1	V33	main sector	mp	25	M4-organic sand
059-071	charcoals	2	R24	main sector	la	275	M6-straw
059-071	barks	10	R24	main sector	la	275	M6-straw
059-071	grass stems	2	R24	main sector	la	275	M6-straw
059-071	sticks	2	R24	main sector	la	275	M6-straw
059-071	twigs	7	R24	main sector	la	275	M6-straw
059-072	charcoals	2	V33	main sector	ep	239	M4-organic sand
059-072	fruits	2	V33	main sector	ep	239	M4-organic sand
059-072	sticks	1	V33	main sector	ep	239	M4-organic sand
059-073	charcoals	4	R31	main sector	ep	41	M4-organic sand
059-073	barks	7	R31	main sector	ep	41	M4-organic sand
059-073	grass stems	10	R31	main sector	ep	41	M4-organic sand
059-073	fruits	4	R31	main sector	ep	41	M4-organic sand
059-073	sticks	5	R31	main sector	ep	41	M4-organic sand
059-073	twigs	3	R31	main sector	ep	41	M4-organic sand
059-074	fruits	1	T32	main sector	ep	41	M4-organic sand
059-074	sticks	1	T32	main sector	ep	41	M4-organic sand
059-075	charcoals	3	S32	main sector	ep	41	M4-organic sand
059-075	barks	4	S32	main sector	ep	41	M4-organic sand
059-075	grass stems	2	S32	main sector	ep	41	M4-organic sand
059-075	fruits	3	S32	main sector	ep	41	M4-organic sand
059-075	twigs	1	S32	main sector	ep	41	M4-organic sand
059-076	charcoals	1	R32	main sector	la	103	M4-organic sand
059-076	barks	3	R32	main sector	la	103	M4-organic sand
059-076	twigs	1	R32	main sector	la	103	M4-organic sand
059-077	charcoals	1	T32	main sector	ep	41	M4-organic sand
059-077	barks	4	T32	main sector	ep	41	M4-organic sand
059-077	twigs	1	T32	main sector	ep	41	M4-organic sand
059-078	charcoals	2	R33	main sector	ep	270	F5-ash dump
059-078	barks	1	R33	main sector	ep	270	F5-ash dump
059-078	fruits	4	R33	main sector	ep	270	F5-ash dump
059-078	sticks	6	R33	main sector	ep	270	F5-ash dump
059-078	twigs	3	R33	main sector	ep	270	F5-ash dump
059-079	barks	2	R25	main sector	la	132	M4-organic sand
059-079	sticks	3	R25	main sector	la	132	M4-organic sand
059-079	twigs	2	R25	main sector	la	132	M4-organic sand
059-080	charcoals	3	R27	main sector	la	132	M4-organic sand
059-080	barks	17	R27	main sector	la	132	M4-organic sand
059-080	grass stems	3	R27	main sector	la	132	M4-organic sand
059-080	fruits	2	R27	main sector	la	132	M4-organic sand
059-080	sticks	19	R27	main sector	la	132	M4-organic sand
059-080	twigs	7	R27	main sector	la	132	M4-organic sand
059-081	charcoals	8	R32	main sector	ep	38	M2-humified organic sands
059-081	barks	2	R32	main sector	ep	38	M2-humified organic sands
059-081	grass stems	1	R32	main sector	ep	38	M2-humified organic sands
059-081	fruits	11	R32	main sector	ep	38	M2-humified organic sands
059-081	sticks	4	R32	main sector	ep	38	M2-humified organic sands
059-081	roots	3	R32	main sector	ep	38	M2-humified organic sands
059-081	twigs	3	R32	main sector	ep	38	M2-humified organic sands
059-082	charcoals	1	R33	main sector	ep	41	M4-organic sand
059-082	barks	1	R33	main sector	ep	41	M4-organic sand
059-082	fruits	27	R33	main sector	ep	41	M4-organic sand
059-082	twigs	1	R33	main sector	ep	41	M4-organic sand
059-083	barks	5	T26	main sector	la	224	M4-organic sand
059-083	fruits	2	T26	main sector	la	224	M4-organic sand
059-083	sticks	1	T26	main sector	la	224	M4-organic sand
059-083	twigs	1	T26	main sector	la	224	M4-organic sand
059-084	charcoals	4	R25	main sector	la	197	F4-hearth
059-084	barks	1	R25	main sector	la	197	F4-hearth
059-084	grass stems	1	R25	main sector	la	197	F4-hearth
059-084	fruits	2	R25	main sector	la	197	F4-hearth
059-084	twigs	1	R25	main sector	la	197	F4-hearth
059-085	charcoals	3	R24	main sector	la	195	M4-organic sand
059-085	barks	3	R24	main sector	la	195	M4-organic sand
059-085	grass stems	1	R24	main sector	la	195	M4-organic sand
059-085	fruits	3	R24	main sector	la	195	M4-organic sand
059-085	sticks	2	R24	main sector	la	195	M4-organic sand
059-085	twigs	3	R24	main sector	la	195	M4-organic sand
059-086	charcoals	1	T32	main sector	ep	38	M2-humified organic sands
059-086	barks	2	T32	main sector	ep	38	M2-humified organic sands
059-086	fruits	5	T32	main sector	ep	38	M2-humified organic sands
059-086	sticks	2	T32	main sector	ep	38	M2-humified organic sands
059-087	charcoals	4	T33	main sector	ep	41	M4-organic sand
059-087	barks	5	T33	main sector	ep	41	M4-organic sand
059-087	grass stems	1	T33	main sector	ep	41	M4-organic sand
059-087	fruits	5	T33	main sector	ep	41	M4-organic sand
059-087	sticks	2	T33	main sector	ep	41	M4-organic sand
059-087	roots	1	T33	main sector	ep	41	M4-organic sand
059-087	twigs	1	T33	main sector	ep	41	M4-organic sand
059-088	barks	2	R24	main sector	la	132	M4-organic sand
059-088	grass stems	1	R24	main sector	la	132	M4-organic sand
059-088	sticks	3	R24	main sector	la	132	M4-organic sand
059-090	sticks	1	R31	main sector	ep	41	M4-organic sand
059-091	charcoals	3	T27	main sector	la	224	M4-organic sand
059-091	barks	4	T27	main sector	la	224	M4-organic sand
059-091	fruits	1	T27	main sector	la	224	M4-organic sand
059-091	sticks	1	T27	main sector	la	224	M4-organic sand
059-092	charcoals	1	U31	main sector	ep	41	M4-organic sand
059-092	barks	1	U31	main sector	ep	41	M4-organic sand
059-092	fruits	3	U31	main sector	ep	41	M4-organic sand
059-092	twigs	1	U31	main sector	ep	41	M4-organic sand
059-093	barks	1	R34	main sector	la	132	M4-organic sand
059-093	fruits	1	R34	main sector	la	132	M4-organic sand
059-094	charcoals	1	R24	main sector	la	132	M4-organic sand
059-094	barks	3	R24	main sector	la	132	M4-organic sand
059-094	sticks	2	R24	main sector	la	132	M4-organic sand
059-094	twigs	1	R24	main sector	la	132	M4-organic sand
059-095	charcoals	1	T33	main sector	mp	246	F6-informal st. str.
059-095	barks	2	T33	main sector	mp	246	F6-informal st. str.
059-095	fruits	2	T33	main sector	mp	246	F6-informal st. str.
059-096	charcoals	2	R24	main sector	la	258	F5-ash dump
059-097	charcoals	2	R25	main sector	la	132	M4-organic sand
059-097	barks	7	R25	main sector	la	132	M4-organic sand
059-097	grass stems	1	R25	main sector	la	132	M4-organic sand
059-097	fruits	2	R25	main sector	la	132	M4-organic sand
059-097	sticks	4	R25	main sector	la	132	M4-organic sand
059-097	twigs	3	R25	main sector	la	132	M4-organic sand
059-098	sticks	1	S31	main sector	la	103	M4-organic sand
059-098	twigs	2	S31	main sector	la	103	M4-organic sand
059-099	charcoals	2	R25	main sector	la	195	M4-organic sand
059-099	barks	3	R25	main sector	la	195	M4-organic sand
059-099	twigs	2	R25	main sector	la	195	M4-organic sand
060-001	charcoals	11	R33	main sector	mp	25	M4-organic sand
060-001	barks	38	R33	main sector	mp	25	M4-organic sand
060-001	grass stems	14	R33	main sector	mp	25	M4-organic sand
060-001	fruits	27	R33	main sector	mp	25	M4-organic sand
060-001	sticks	4	R33	main sector	mp	25	M4-organic sand
060-001	twigs	11	R33	main sector	mp	25	M4-organic sand
060-002	charcoals	2	U33	main sector	mp	25	M4-organic sand
060-002	barks	5	U33	main sector	mp	25	M4-organic sand
060-002	fruits	7	U33	main sector	mp	25	M4-organic sand
060-002	twigs	2	U33	main sector	mp	25	M4-organic sand
060-003	charcoals	16	V31	main sector	mp	25	M4-organic sand
060-003	charcoals	16	V32	main sector	mp	25	M4-organic sand
060-003	barks	9.5	V31	main sector	mp	25	M4-organic sand
060-003	barks	9.5	V32	main sector	mp	25	M4-organic sand
060-003	grass stems	0.5	V31	main sector	mp	25	M4-organic sand
060-003	grass stems	0.5	V32	main sector	mp	25	M4-organic sand
060-003	fruits	5	V31	main sector	mp	25	M4-organic sand
060-003	fruits	5	V32	main sector	mp	25	M4-organic sand
060-003	roots	1	V31	main sector	mp	25	M4-organic sand
060-003	roots	1	V32	main sector	mp	25	M4-organic sand
060-003	twigs	4	V31	main sector	mp	25	M4-organic sand
060-003	twigs	4	V32	main sector	mp	25	M4-organic sand
060-004	charcoals	3	R31	main sector	mp	25	M4-organic sand
060-004	barks	5	R31	main sector	mp	25	M4-organic sand
060-004	fruits	8	R31	main sector	mp	25	M4-organic sand
060-005	charcoals	18	U33	main sector	mp	25	M4-organic sand
060-005	barks	20	U33	main sector	mp	25	M4-organic sand
060-005	grass stems	2	U33	main sector	mp	25	M4-organic sand
060-005	fruits	26	U33	main sector	mp	25	M4-organic sand
060-005	sticks	4	U33	main sector	mp	25	M4-organic sand
060-005	twigs	4	U33	main sector	mp	25	M4-organic sand
060-006	charcoals	19	S32	main sector	mp	25	M4-organic sand
060-006	barks	20	S32	main sector	mp	25	M4-organic sand
060-006	grass stems	1	S32	main sector	mp	25	M4-organic sand
060-006	fruits	20	S32	main sector	mp	25	M4-organic sand
060-006	sticks	8	S32	main sector	mp	25	M4-organic sand
060-006	twigs	5	S32	main sector	mp	25	M4-organic sand
060-007	charcoals	1	R33	main sector	mp	25	M4-organic sand
060-007	barks	5	R33	main sector	mp	25	M4-organic sand
060-007	grass stems	1	R33	main sector	mp	25	M4-organic sand
060-007	fruits	3	R33	main sector	mp	25	M4-organic sand
060-007	roots	1	R33	main sector	mp	25	M4-organic sand
060-007	twigs	2	R33	main sector	mp	25	M4-organic sand
060-008	charcoals	3	R27	main sector	la	132	M4-organic sand
060-008	barks	38	R27	main sector	la	132	M4-organic sand
060-008	grass stems	1	R27	main sector	la	132	M4-organic sand
060-008	fruits	2	R27	main sector	la	132	M4-organic sand
060-008	sticks	9	R27	main sector	la	132	M4-organic sand
060-008	roots	1	R27	main sector	la	132	M4-organic sand
060-008	twigs	21	R27	main sector	la	132	M4-organic sand
060-009	charcoals	3	U34	main sector	mp	25	M4-organic sand
060-009	barks	7	U34	main sector	mp	25	M4-organic sand
060-009	fruits	6	U34	main sector	mp	25	M4-organic sand
060-009	sticks	4	U34	main sector	mp	25	M4-organic sand
060-010	charcoals	2	U32	main sector	mp	25	M4-organic sand
060-011	charcoals	2	V34	main sector	ep	239	M4-organic sand
060-011	fruits	2	V34	main sector	ep	239	M4-organic sand
060-011	sticks	2	V34	main sector	ep	239	M4-organic sand
060-011	twigs	5	V34	main sector	ep	239	M4-organic sand
060-012	charcoals	6	S31	main sector	ep	244	F1-pit
060-012	barks	8	S31	main sector	ep	244	F1-pit
060-012	grass stems	6	S31	main sector	ep	244	F1-pit
060-012	fruits	6	S31	main sector	ep	244	F1-pit
060-012	sticks	3	S31	main sector	ep	244	F1-pit
060-012	roots	1	S31	main sector	ep	244	F1-pit
060-012	twigs	2	S31	main sector	ep	244	F1-pit
060-014	charcoals	1	S34	main sector	mp	25	M4-organic sand
060-014	barks	2	S34	main sector	mp	25	M4-organic sand
060-014	fruits	8	S34	main sector	mp	25	M4-organic sand
060-014	sticks	1	S34	main sector	mp	25	M4-organic sand
060-014	roots	3	S34	main sector	mp	25	M4-organic sand
060-014	twigs	3	S34	main sector	mp	25	M4-organic sand
060-016	charcoals	13	R26	main sector	la	195	M4-organic sand
060-016	barks	21	R26	main sector	la	195	M4-organic sand
060-016	grass stems	3	R26	main sector	la	195	M4-organic sand
060-016	fruits	3	R26	main sector	la	195	M4-organic sand
060-016	sticks	7	R26	main sector	la	195	M4-organic sand
060-016	twigs	6	R26	main sector	la	195	M4-organic sand
060-017	charcoals	8	U30	main sector	la	199	M5-stone line/accumulation
060-017	barks	1	U30	main sector	la	199	M5-stone line/accumulation
060-017	twigs	1	U30	main sector	la	199	M5-stone line/accumulation
060-019	barks	13	R22	main sector	la	132	M4-organic sand
060-019	sticks	1	R22	main sector	la	132	M4-organic sand
060-019	twigs	5	R22	main sector	la	132	M4-organic sand
060-020	charcoals	5	R32	main sector	ep	41	M4-organic sand
060-020	barks	2	R32	main sector	ep	41	M4-organic sand
060-020	fruits	13	R32	main sector	ep	41	M4-organic sand
060-020	sticks	2	R32	main sector	ep	41	M4-organic sand
060-020	twigs	1	R32	main sector	ep	41	M4-organic sand
060-021	charcoals	2	V26	main sector	la	156	M4-organic sand
060-021	barks	5	V26	main sector	la	156	M4-organic sand
060-021	fruits	2	V26	main sector	la	156	M4-organic sand
060-022	charcoals	18	T33	main sector	mp	25	M4-organic sand
060-022	barks	14	T33	main sector	mp	25	M4-organic sand
060-022	grass stems	6	T33	main sector	mp	25	M4-organic sand
060-022	fruits	11	T33	main sector	mp	25	M4-organic sand
060-022	sticks	5	T33	main sector	mp	25	M4-organic sand
060-022	twigs	7	T33	main sector	mp	25	M4-organic sand
060-023	charcoals	6	S29	main sector	mp	231	F4-hearth
060-023	charcoals	6	S30	main sector	mp	231	F4-hearth
060-023	grass stems	1.5	S29	main sector	mp	231	F4-hearth
060-023	grass stems	1.5	S30	main sector	mp	231	F4-hearth
060-023	fruits	0.5	S29	main sector	mp	231	F4-hearth
060-023	fruits	0.5	S30	main sector	mp	231	F4-hearth
060-023	sticks	4.5	S29	main sector	mp	231	F4-hearth
060-023	sticks	4.5	S30	main sector	mp	231	F4-hearth
060-023	twigs	1	S29	main sector	mp	231	F4-hearth
060-023	twigs	1	S30	main sector	mp	231	F4-hearth
060-024	barks	7	S24	main sector	la	275	M6-straw
060-024	grass stems	1	S24	main sector	la	275	M6-straw
060-024	sticks	1	S24	main sector	la	275	M6-straw
060-024	twigs	1	S24	main sector	la	275	M6-straw
060-025	charcoals	2	R25	main sector	la	197	F4-hearth
060-025	barks	5	R25	main sector	la	197	F4-hearth
060-025	grass stems	1	R25	main sector	la	197	F4-hearth
060-025	fruits	5	R25	main sector	la	197	F4-hearth
060-025	sticks	6	R25	main sector	la	197	F4-hearth
060-025	twigs	4	R25	main sector	la	197	F4-hearth
060-027	charcoals	1.25	T32	main sector	mp	246	F6-informal st. str.
060-027	charcoals	1.25	T33	main sector	mp	246	F6-informal st. str.
060-027	charcoals	1.25	U32	main sector	mp	246	F6-informal st. str.
060-027	charcoals	1.25	U33	main sector	mp	246	F6-informal st. str.
060-027	barks	0.75	T32	main sector	mp	246	F6-informal st. str.
060-027	barks	0.75	T33	main sector	mp	246	F6-informal st. str.
060-027	barks	0.75	U32	main sector	mp	246	F6-informal st. str.
060-027	barks	0.75	U33	main sector	mp	246	F6-informal st. str.
060-027	fruits	0.25	T32	main sector	mp	246	F6-informal st. str.
060-027	fruits	0.25	T33	main sector	mp	246	F6-informal st. str.
060-027	fruits	0.25	U32	main sector	mp	246	F6-informal st. str.
060-027	fruits	0.25	U33	main sector	mp	246	F6-informal st. str.
060-028	charcoals	14	U34	main sector	mp	25	M4-organic sand
060-028	barks	4	U34	main sector	mp	25	M4-organic sand
060-028	grass stems	1	U34	main sector	mp	25	M4-organic sand
060-028	fruits	7	U34	main sector	mp	25	M4-organic sand
060-028	sticks	6	U34	main sector	mp	25	M4-organic sand
060-028	twigs	3	U34	main sector	mp	25	M4-organic sand
060-030	barks	3	T31	main sector	la	267	F5-ash dump
060-031	fruits	4	R32	main sector	mp	25	M4-organic sand
060-032	charcoals	1	T25	main sector	la	173	M8-floor
060-032	barks	6	T25	main sector	la	173	M8-floor
060-032	grass stems	2	T25	main sector	la	173	M8-floor
060-033	barks	9	R26	main sector	la	132	M4-organic sand
060-033	grass stems	2	R26	main sector	la	132	M4-organic sand
060-033	fruits	1	R26	main sector	la	132	M4-organic sand
060-033	sticks	4	R26	main sector	la	132	M4-organic sand
060-033	twigs	1	R26	main sector	la	132	M4-organic sand
060-034	charcoals	6	U30	main sector	la	199	M5-stone line/accumulation
060-034	barks	6	U30	main sector	la	199	M5-stone line/accumulation
060-034	grass stems	1	U30	main sector	la	199	M5-stone line/accumulation
060-034	fruits	1	U30	main sector	la	199	M5-stone line/accumulation
060-034	twigs	4	U30	main sector	la	199	M5-stone line/accumulation
060-035	barks	1	V33	main sector	mp	25	M4-organic sand
060-035	fruits	1	V33	main sector	mp	25	M4-organic sand
060-035	sticks	2	V33	main sector	mp	25	M4-organic sand
060-036	charcoals	41	R27	main sector	la	195	M4-organic sand
060-036	barks	17	R27	main sector	la	195	M4-organic sand
060-036	grass stems	1	R27	main sector	la	195	M4-organic sand
060-036	fruits	6	R27	main sector	la	195	M4-organic sand
060-036	sticks	5	R27	main sector	la	195	M4-organic sand
060-036	twigs	5	R27	main sector	la	195	M4-organic sand
060-037	charcoals	6	V34	main sector	mp	25	M4-organic sand
060-037	barks	1	V34	main sector	mp	25	M4-organic sand
060-037	fruits	8	V34	main sector	mp	25	M4-organic sand
060-037	sticks	1	V34	main sector	mp	25	M4-organic sand
060-037	twigs	1	V34	main sector	mp	25	M4-organic sand
060-038	charcoals	5	U31	main sector	ep	41	M4-organic sand
060-038	barks	1	U31	main sector	ep	41	M4-organic sand
060-038	grass stems	1	U31	main sector	ep	41	M4-organic sand
060-038	fruits	3	U31	main sector	ep	41	M4-organic sand
060-038	twigs	1	U31	main sector	ep	41	M4-organic sand
060-039	charcoals	3	U31	main sector	mp	25	M4-organic sand
060-039	barks	8	U31	main sector	mp	25	M4-organic sand
060-039	grass stems	3	U31	main sector	mp	25	M4-organic sand
060-039	fruits	2	U31	main sector	mp	25	M4-organic sand
060-039	sticks	1	U31	main sector	mp	25	M4-organic sand
060-039	roots	2	U31	main sector	mp	25	M4-organic sand
060-039	twigs	6	U31	main sector	mp	25	M4-organic sand
060-040	charcoals	4	U32	main sector	mp	25	M4-organic sand
060-040	barks	13	U32	main sector	mp	25	M4-organic sand
060-040	grass stems	1	U32	main sector	mp	25	M4-organic sand
060-040	fruits	3	U32	main sector	mp	25	M4-organic sand
060-040	sticks	3	U32	main sector	mp	25	M4-organic sand
060-040	roots	1	U32	main sector	mp	25	M4-organic sand
060-040	twigs	7	U32	main sector	mp	25	M4-organic sand
060-041	charcoals	8	T29	main sector	mp	233	F4-hearth
060-041	barks	5	T29	main sector	mp	233	F4-hearth
060-042	charcoals	8	V33	main sector	ep	254	M3-cemented organic sands
060-042	barks	4	V33	main sector	ep	254	M3-cemented organic sands
060-042	fruits	8	V33	main sector	ep	254	M3-cemented organic sands
060-042	sticks	3	V33	main sector	ep	254	M3-cemented organic sands
060-042	twigs	3	V33	main sector	ep	254	M3-cemented organic sands
060-043	charcoals	5	V31	main sector	ep	239	M4-organic sand
060-043	barks	7	V31	main sector	ep	239	M4-organic sand
060-043	fruits	4	V31	main sector	ep	239	M4-organic sand
060-043	sticks	1	V31	main sector	ep	239	M4-organic sand
060-044	charcoals	24	V24	main sector	la	228	F1-pit
060-045	charcoals	1	U32	main sector	lp	186	F4-hearth
060-046	charcoals	2	R33	main sector	ep	38	M2-humified organic sands
060-046	fruits	1	R33	main sector	ep	38	M2-humified organic sands
060-046	twigs	1	R33	main sector	ep	38	M2-humified organic sands
060-047	barks	1	V33	main sector	ep	239	M4-organic sand
060-047	grass stems	3	V33	main sector	ep	239	M4-organic sand
060-047	fruits	5	V33	main sector	ep	239	M4-organic sand
060-047	sticks	1	V33	main sector	ep	239	M4-organic sand
060-047	twigs	3	V33	main sector	ep	239	M4-organic sand
060-048	charcoals	10	V27	main sector	la	199	M5-stone line/accumulation
060-049	charcoals	2	V26	main sector	la	185	M5-stone line/accumulation
060-049	fruits	2	V26	main sector	la	185	M5-stone line/accumulation
060-049	sticks	3	V26	main sector	la	185	M5-stone line/accumulation
060-050	charcoals	9	T34	main sector	mp	25	M4-organic sand
060-050	barks	10	T34	main sector	mp	25	M4-organic sand
060-050	grass stems	2	T34	main sector	mp	25	M4-organic sand
060-050	fruits	3	T34	main sector	mp	25	M4-organic sand
060-050	sticks	2	T34	main sector	mp	25	M4-organic sand
060-050	twigs	6	T34	main sector	mp	25	M4-organic sand
060-052	charcoals	2	R22	main sector	la	132	M4-organic sand
060-052	barks	11	R22	main sector	la	132	M4-organic sand
060-052	grass stems	1	R22	main sector	la	132	M4-organic sand
060-052	twigs	2	R22	main sector	la	132	M4-organic sand
060-053	charcoals	2	R22	main sector	la	275	M6-straw
060-053	barks	11	R22	main sector	la	275	M6-straw
060-053	fruits	1	R22	main sector	la	275	M6-straw
060-053	sticks	2	R22	main sector	la	275	M6-straw
060-053	twigs	3	R22	main sector	la	275	M6-straw
060-054	charcoals	4	V32	main sector	ep	239	M4-organic sand
060-054	barks	1	V32	main sector	ep	239	M4-organic sand
060-054	twigs	1	V32	main sector	ep	239	M4-organic sand
060-055	charcoals	4	R24	main sector	la	195	M4-organic sand
060-055	barks	5	R24	main sector	la	195	M4-organic sand
060-055	grass stems	1	R24	main sector	la	195	M4-organic sand
060-057	charcoals	11	T31	main sector	ep	38	M2-humified organic sands
060-057	barks	4	T31	main sector	ep	38	M2-humified organic sands
060-057	grass stems	4	T31	main sector	ep	38	M2-humified organic sands
060-057	sticks	1	T31	main sector	ep	38	M2-humified organic sands
060-057	twigs	4	T31	main sector	ep	38	M2-humified organic sands
060-058	charcoals	5	S28	main sector	la	225	F4-hearth
060-058	barks	1	S28	main sector	la	225	F4-hearth
060-058	sticks	6	S28	main sector	la	225	F4-hearth
060-058	twigs	1	S28	main sector	la	225	F4-hearth
060-059	charcoals	10	V32	main sector	ep	239	M4-organic sand
060-059	fruits	2	V32	main sector	ep	239	M4-organic sand
060-060	charcoals	2	T29	main sector	la	225	F4-hearth
060-060	sticks	4	T29	main sector	la	225	F4-hearth
060-061	barks	3	V31	main sector	ep	239	M4-organic sand
060-061	fruits	6	V31	main sector	ep	239	M4-organic sand
060-063	charcoals	1	S31	main sector	mp	25	M4-organic sand
060-063	barks	3	S31	main sector	mp	25	M4-organic sand
060-063	grass stems	1	S31	main sector	mp	25	M4-organic sand
060-063	fruits	2	S31	main sector	mp	25	M4-organic sand
060-063	twigs	3	S31	main sector	mp	25	M4-organic sand
060-064	charcoals	4	U25	main sector	la	242	F3-kettle
060-064	sticks	1	U25	main sector	la	242	F3-kettle
060-065	charcoals	8	T33	main sector	mp	25	M4-organic sand
060-065	barks	9	T33	main sector	mp	25	M4-organic sand
060-065	grass stems	6	T33	main sector	mp	25	M4-organic sand
060-065	fruits	11	T33	main sector	mp	25	M4-organic sand
060-065	sticks	1	T33	main sector	mp	25	M4-organic sand
060-066	barks	1	U31	main sector	mp	25	M4-organic sand
060-067	twigs	1	T30	main sector	la	156	M4-organic sand
060-068	charcoals	3	V24	main sector	la	228	F1-pit
060-069	charcoals	12	V25	main sector	la	240	F3-kettle
060-069	grass stems	1	V25	main sector	la	240	F3-kettle
060-071	charcoals	2	S33	main sector	ep	38	M2-humified organic sands
060-071	fruits	3	S33	main sector	ep	38	M2-humified organic sands
060-071	sticks	2	S33	main sector	ep	38	M2-humified organic sands
060-071	twigs	1	S33	main sector	ep	38	M2-humified organic sands
060-072	charcoals	5	T31	main sector	mp	25	M4-organic sand
060-072	barks	8	T31	main sector	mp	25	M4-organic sand
060-072	grass stems	4	T31	main sector	mp	25	M4-organic sand
060-072	fruits	1	T31	main sector	mp	25	M4-organic sand
060-072	sticks	3	T31	main sector	mp	25	M4-organic sand
060-072	twigs	2	T31	main sector	mp	25	M4-organic sand
060-073	charcoals	5	R23	main sector	la	195	M4-organic sand
060-073	barks	9	R23	main sector	la	195	M4-organic sand
060-073	grass stems	2	R23	main sector	la	195	M4-organic sand
060-073	roots	1	R23	main sector	la	195	M4-organic sand
060-073	twigs	3	R23	main sector	la	195	M4-organic sand
060-075	charcoals	7	V33	main sector	ep	239	M4-organic sand
060-075	barks	1	V33	main sector	ep	239	M4-organic sand
060-075	grass stems	3	V33	main sector	ep	239	M4-organic sand
060-075	fruits	6	V33	main sector	ep	239	M4-organic sand
060-075	twigs	4	V33	main sector	ep	239	M4-organic sand
060-075	seeds	1	V33	main sector	ep	239	M4-organic sand
060-076	charcoals	6	U31	main sector	ep	41	M4-organic sand
060-076	barks	7	U31	main sector	ep	41	M4-organic sand
060-076	grass stems	3	U31	main sector	ep	41	M4-organic sand
060-076	fruits	6	U31	main sector	ep	41	M4-organic sand
060-076	sticks	1	U31	main sector	ep	41	M4-organic sand
060-076	roots	3	U31	main sector	ep	41	M4-organic sand
060-076	twigs	4	U31	main sector	ep	41	M4-organic sand
060-077	charcoals	1	U26	main sector	la	156	M4-organic sand
060-077	barks	7	U26	main sector	la	156	M4-organic sand
060-078	charcoals	1	S32	main sector	ep	41	M4-organic sand
060-078	barks	6	S32	main sector	ep	41	M4-organic sand
060-078	grass stems	1	S32	main sector	ep	41	M4-organic sand
060-078	fruits	1	S32	main sector	ep	41	M4-organic sand
060-078	twigs	1	S32	main sector	ep	41	M4-organic sand
060-079	charcoals	36	U33	main sector	mp	243	F5-ash dump
060-079	barks	2	U33	main sector	mp	243	F5-ash dump
060-079	fruits	3	U33	main sector	mp	243	F5-ash dump
060-079	twigs	1	U33	main sector	mp	243	F5-ash dump
060-079	seeds	2	U33	main sector	mp	243	F5-ash dump
060-080	charcoals	2	R32	main sector	mp	25	M4-organic sand
060-080	barks	2	R32	main sector	mp	25	M4-organic sand
060-080	grass stems	3	R32	main sector	mp	25	M4-organic sand
060-080	fruits	8	R32	main sector	mp	25	M4-organic sand
060-080	sticks	2	R32	main sector	mp	25	M4-organic sand
060-080	twigs	2	R32	main sector	mp	25	M4-organic sand
060-081	charcoals	1	V31	main sector	ep	239	M4-organic sand
060-081	barks	3	V31	main sector	ep	239	M4-organic sand
060-081	fruits	1	V31	main sector	ep	239	M4-organic sand
060-082	charcoals	1	U31	main sector	ep	41	M4-organic sand
060-082	sticks	1	U31	main sector	ep	41	M4-organic sand
060-082	twigs	1	U31	main sector	ep	41	M4-organic sand
061-001	charcoals	8	U33	main sector	mp	25	M4-organic sand
061-001	barks	5	U33	main sector	mp	25	M4-organic sand
061-001	grass stems	1	U33	main sector	mp	25	M4-organic sand
061-001	fruits	21	U33	main sector	mp	25	M4-organic sand
061-001	sticks	1	U33	main sector	mp	25	M4-organic sand
061-001	roots	1	U33	main sector	mp	25	M4-organic sand
061-001	twigs	1	U33	main sector	mp	25	M4-organic sand
061-002	charcoals	6	U34	main sector	mp	25	M4-organic sand
061-002	barks	25	U34	main sector	mp	25	M4-organic sand
061-002	fruits	7	U34	main sector	mp	25	M4-organic sand
061-002	roots	1	U34	main sector	mp	25	M4-organic sand
061-002	twigs	4	U34	main sector	mp	25	M4-organic sand
061-003	charcoals	21	U27	main sector	la	156	M4-organic sand
061-003	barks	19	U27	main sector	la	156	M4-organic sand
061-003	fruits	3	U27	main sector	la	156	M4-organic sand
061-003	sticks	6	U27	main sector	la	156	M4-organic sand
061-004	charcoals	1	S27	main sector	la	225	F4-hearth
061-004	barks	16	S27	main sector	la	225	F4-hearth
061-004	fruits	1	S27	main sector	la	225	F4-hearth
061-004	sticks	5	S27	main sector	la	225	F4-hearth
061-005	twigs	1	S25	main sector	la	172	M4-organic sand
061-006	charcoals	10	T22	main sector	la	178	M4-organic sand
061-006	barks	9	T22	main sector	la	178	M4-organic sand
061-006	grass stems	16	T22	main sector	la	178	M4-organic sand
061-006	fruits	2	T22	main sector	la	178	M4-organic sand
061-006	sticks	10	T22	main sector	la	178	M4-organic sand
061-006	twigs	6	T22	main sector	la	178	M4-organic sand
061-008	charcoals	4	V34	main sector	mp	25	M4-organic sand
061-008	barks	5	V34	main sector	mp	25	M4-organic sand
061-008	grass stems	2	V34	main sector	mp	25	M4-organic sand
061-008	fruits	7	V34	main sector	mp	25	M4-organic sand
061-008	sticks	2	V34	main sector	mp	25	M4-organic sand
061-008	twigs	1	V34	main sector	mp	25	M4-organic sand
061-009	fruits	3	T31	main sector	mp	25	M4-organic sand
061-010	charcoals	11	U28	main sector	la	199	M5-stone line/accumulation
061-011	charcoals	7	S26	main sector	la	173	M8-floor
061-011	barks	12	S26	main sector	la	173	M8-floor
061-011	fruits	3	S26	main sector	la	173	M8-floor
061-011	sticks	4	S26	main sector	la	173	M8-floor
061-011	twigs	3	S26	main sector	la	173	M8-floor
061-012	charcoals	5	Z24	main sector	la	171	M5-stone line/accumulation
061-013	charcoals	1	T23	main sector	la	178	M4-organic sand
061-013	barks	1	T23	main sector	la	178	M4-organic sand
061-013	sticks	2	T23	main sector	la	178	M4-organic sand
061-014	charcoals	7	T23	main sector	la	215	F4-hearth
061-014	barks	2	T23	main sector	la	215	F4-hearth
061-014	fruits	2	T23	main sector	la	215	F4-hearth
061-014	sticks	3	T23	main sector	la	215	F4-hearth
061-014	twigs	5	T23	main sector	la	215	F4-hearth
061-015	charcoals	2.5	S25	main sector	la	173	M8-floor
061-015	charcoals	2.5	S26	main sector	la	173	M8-floor
061-015	charcoals	2.5	T25	main sector	la	173	M8-floor
061-015	charcoals	2.5	T26	main sector	la	173	M8-floor
061-015	barks	8	S25	main sector	la	173	M8-floor
061-015	barks	8	S26	main sector	la	173	M8-floor
061-015	barks	8	T25	main sector	la	173	M8-floor
061-015	barks	8	T26	main sector	la	173	M8-floor
061-015	grass stems	0.25	S25	main sector	la	173	M8-floor
061-015	grass stems	0.25	S26	main sector	la	173	M8-floor
061-015	grass stems	0.25	T25	main sector	la	173	M8-floor
061-015	grass stems	0.25	T26	main sector	la	173	M8-floor
061-015	fruits	0.5	S25	main sector	la	173	M8-floor
061-015	fruits	0.5	S26	main sector	la	173	M8-floor
061-015	fruits	0.5	T25	main sector	la	173	M8-floor
061-015	fruits	0.5	T26	main sector	la	173	M8-floor
061-015	sticks	4.75	S25	main sector	la	173	M8-floor
061-015	sticks	4.75	S26	main sector	la	173	M8-floor
061-015	sticks	4.75	T25	main sector	la	173	M8-floor
061-015	sticks	4.75	T26	main sector	la	173	M8-floor
061-015	twigs	1.25	S25	main sector	la	173	M8-floor
061-015	twigs	1.25	S26	main sector	la	173	M8-floor
061-015	twigs	1.25	T25	main sector	la	173	M8-floor
061-015	twigs	1.25	T26	main sector	la	173	M8-floor
061-016	charcoals	2	T29	main sector	la	156	M4-organic sand
061-016	barks	7	T29	main sector	la	156	M4-organic sand
061-016	twigs	4	T29	main sector	la	156	M4-organic sand
061-017	charcoals	6	U22	main sector	la	178	M4-organic sand
061-017	barks	18	U22	main sector	la	178	M4-organic sand
061-017	sticks	2	U22	main sector	la	178	M4-organic sand
061-018	charcoals	1	S31	main sector	mp	25	M4-organic sand
061-018	barks	1	S31	main sector	mp	25	M4-organic sand
061-018	fruits	2	S31	main sector	mp	25	M4-organic sand
061-018	sticks	2	S31	main sector	mp	25	M4-organic sand
061-018	twigs	1	S31	main sector	mp	25	M4-organic sand
061-019	charcoals	2	U23	main sector	la	178	M4-organic sand
061-019	twigs	2	U23	main sector	la	178	M4-organic sand
061-020	charcoals	12	U25	main sector	la	178	M4-organic sand
061-020	barks	4	U25	main sector	la	178	M4-organic sand
061-020	sticks	1	U25	main sector	la	178	M4-organic sand
061-020	twigs	1	U25	main sector	la	178	M4-organic sand
061-021	charcoals	2	V30	main sector	la	221	F6-informal st. str.
061-022	charcoals	1	R34	main sector	mp	25	M4-organic sand
061-022	fruits	1	R34	main sector	mp	25	M4-organic sand
061-022	sticks	1	R34	main sector	mp	25	M4-organic sand
061-023	charcoals	23	V28	main sector	la	199	M5-stone line/accumulation
061-023	grass stems	1	V28	main sector	la	199	M5-stone line/accumulation
061-024	charcoals	1	S26	main sector	la	213	M8-floor
061-024	barks	7	S26	main sector	la	213	M8-floor
061-025	charcoals	7	U32	main sector	ep	41	M4-organic sand
061-025	barks	2	U32	main sector	ep	41	M4-organic sand
061-025	grass stems	3	U32	main sector	ep	41	M4-organic sand
061-025	fruits	1	U32	main sector	ep	41	M4-organic sand
061-025	sticks	2	U32	main sector	ep	41	M4-organic sand
061-025	twigs	4	U32	main sector	ep	41	M4-organic sand
061-026	charcoals	3	U33	main sector	mp	25	M4-organic sand
061-026	barks	1	U33	main sector	mp	25	M4-organic sand
061-026	fruits	6	U33	main sector	mp	25	M4-organic sand
061-026	twigs	1	U33	main sector	mp	25	M4-organic sand
061-027	charcoals	5	V32	main sector	mp	25	M4-organic sand
061-027	fruits	1	V32	main sector	mp	25	M4-organic sand
061-027	twigs	1	V32	main sector	mp	25	M4-organic sand
061-028	barks	6	T27	main sector	la	156	M4-organic sand
061-028	fruits	1	T27	main sector	la	156	M4-organic sand
061-029	charcoals	2	V34	main sector	mp	25	M4-organic sand
061-029	barks	1	V34	main sector	mp	25	M4-organic sand
061-029	fruits	1	V34	main sector	mp	25	M4-organic sand
061-030	charcoals	4	T31	main sector	mp	25	M4-organic sand
061-030	barks	1	T31	main sector	mp	25	M4-organic sand
061-030	fruits	1	T31	main sector	mp	25	M4-organic sand
061-030	sticks	1	T31	main sector	mp	25	M4-organic sand
061-032	charcoals	3	Z25	main sector	la	185	M5-stone line/accumulation
061-032	fruits	1	Z25	main sector	la	185	M5-stone line/accumulation
061-032	sticks	4	Z25	main sector	la	185	M5-stone line/accumulation
061-033	charcoals	0.5	S32	main sector	ep	38	M2-humified organic sands
061-033	charcoals	0.5	T32	main sector	ep	38	M2-humified organic sands
061-033	barks	4.5	S32	main sector	ep	38	M2-humified organic sands
061-033	barks	4.5	T32	main sector	ep	38	M2-humified organic sands
061-033	grass stems	0.5	S32	main sector	ep	38	M2-humified organic sands
061-033	grass stems	0.5	T32	main sector	ep	38	M2-humified organic sands
061-033	fruits	1	S32	main sector	ep	38	M2-humified organic sands
061-033	fruits	1	T32	main sector	ep	38	M2-humified organic sands
061-033	sticks	1	S32	main sector	ep	38	M2-humified organic sands
061-033	sticks	1	T32	main sector	ep	38	M2-humified organic sands
061-033	twigs	2.5	S32	main sector	ep	38	M2-humified organic sands
061-033	twigs	2.5	T32	main sector	ep	38	M2-humified organic sands
061-034	fruits	4	U34	main sector	mp	25	M4-organic sand
061-034	twigs	1	U34	main sector	mp	25	M4-organic sand
061-035	barks	1	T23	main sector	la	172	M4-organic sand
061-035	sticks	1	T23	main sector	la	172	M4-organic sand
061-036	charcoals	11	V31	main sector	ep	283	M5-stone line/accumulation
061-036	grass stems	1	V31	main sector	ep	283	M5-stone line/accumulation
061-036	fruits	8	V31	main sector	ep	283	M5-stone line/accumulation
061-036	twigs	1	V31	main sector	ep	283	M5-stone line/accumulation
061-037	barks	8	S31	main sector	mp	25	M4-organic sand
061-037	grass stems	2	S31	main sector	mp	25	M4-organic sand
061-037	twigs	1	S31	main sector	mp	25	M4-organic sand
061-038	charcoals	1	T29	main sector	la	156	M4-organic sand
061-038	barks	3	T29	main sector	la	156	M4-organic sand
061-038	grass stems	1	T29	main sector	la	156	M4-organic sand
061-039	fruits	2	V32	main sector	mp	25	M4-organic sand
061-040	grass stems	3	T25	main sector	la	214	M8-floor
061-041	charcoals	5	T33	main sector	mp	25	M4-organic sand
061-041	barks	22	T33	main sector	mp	25	M4-organic sand
061-041	grass stems	3	T33	main sector	mp	25	M4-organic sand
061-041	fruits	13	T33	main sector	mp	25	M4-organic sand
061-041	sticks	4	T33	main sector	mp	25	M4-organic sand
061-041	twigs	5	T33	main sector	mp	25	M4-organic sand
061-042	fruits	2	V34	main sector	lp	222	F1-pit
061-042	sticks	2	V34	main sector	lp	222	F1-pit
061-042	twigs	1	V34	main sector	lp	222	F1-pit
061-043	charcoals	2	Z24	main sector	la	185	M5-stone line/accumulation
061-044	barks	4	V25	main sector	la	185	M5-stone line/accumulation
061-044	fruits	1	V25	main sector	la	185	M5-stone line/accumulation
061-045	barks	1	R24	main sector	la	255	F5-ash dump
061-045	grass stems	1	R24	main sector	la	255	F5-ash dump
061-046	charcoals	1	T26	main sector	la	156	M4-organic sand
061-046	barks	1	T26	main sector	la	156	M4-organic sand
061-047	charcoals	1	U28	main sector	la	156	M4-organic sand
061-047	barks	3	U28	main sector	la	156	M4-organic sand
061-047	fruits	1	U28	main sector	la	156	M4-organic sand
061-047	sticks	1	U28	main sector	la	156	M4-organic sand
061-048	fruits	4	S34	main sector	mp	25	M4-organic sand
061-049	barks	4	T26	main sector	la	156	M4-organic sand
061-049	sticks	1	T26	main sector	la	156	M4-organic sand
061-050	charcoals	2	U30	main sector	la	156	M4-organic sand
061-050	barks	8	U30	main sector	la	156	M4-organic sand
061-050	grass stems	6	U30	main sector	la	156	M4-organic sand
061-050	fruits	3	U30	main sector	la	156	M4-organic sand
061-050	sticks	4	U30	main sector	la	156	M4-organic sand
061-050	twigs	1	U30	main sector	la	156	M4-organic sand
061-051	charcoals	1	T28	main sector	la	156	M4-organic sand
061-051	grass stems	1	T28	main sector	la	156	M4-organic sand
061-051	fruits	3	T28	main sector	la	156	M4-organic sand
061-051	sticks	2	T28	main sector	la	156	M4-organic sand
061-052	charcoals	1	U26	main sector	la	156	M4-organic sand
061-052	barks	5	U26	main sector	la	156	M4-organic sand
061-053	charcoals	15	U23	main sector	la	178	M4-organic sand
061-053	barks	12	U23	main sector	la	178	M4-organic sand
061-053	grass stems	12	U23	main sector	la	178	M4-organic sand
061-053	fruits	3	U23	main sector	la	178	M4-organic sand
061-053	sticks	11	U23	main sector	la	178	M4-organic sand
061-053	twigs	1	U23	main sector	la	178	M4-organic sand
061-054	charcoals	1	R32	main sector	mp	25	M4-organic sand
061-054	barks	1	R32	main sector	mp	25	M4-organic sand
061-054	fruits	3	R32	main sector	mp	25	M4-organic sand
061-054	sticks	2	R32	main sector	mp	25	M4-organic sand
061-055	charcoals	7	U30	main sector	la	156	M4-organic sand
061-055	barks	11	U30	main sector	la	156	M4-organic sand
061-055	grass stems	6	U30	main sector	la	156	M4-organic sand
061-055	fruits	1	U30	main sector	la	156	M4-organic sand
061-055	sticks	3	U30	main sector	la	156	M4-organic sand
061-055	twigs	5	U30	main sector	la	156	M4-organic sand
061-056	charcoals	1	U32	main sector	ep	286	M4-organic sand
061-056	twigs	2	U32	main sector	ep	286	M4-organic sand
061-057	charcoals	2	R32	main sector	mp	25	M4-organic sand
061-057	barks	2	R32	main sector	mp	25	M4-organic sand
061-057	fruits	3	R32	main sector	mp	25	M4-organic sand
061-057	twigs	1	R32	main sector	mp	25	M4-organic sand
061-058	charcoals	2	U23	main sector	la	178	M4-organic sand
061-058	barks	8	U23	main sector	la	178	M4-organic sand
061-058	sticks	2	U23	main sector	la	178	M4-organic sand
061-058	twigs	2	U23	main sector	la	178	M4-organic sand
061-059	charcoals	3	R31	main sector	mp	209	F4-hearth
061-060	charcoals	1	V26	main sector	la	185	M5-stone line/accumulation
061-060	barks	1	V26	main sector	la	185	M5-stone line/accumulation
061-060	fruits	1	V26	main sector	la	185	M5-stone line/accumulation
061-061	charcoals	2	T34	main sector	mp	25	M4-organic sand
061-061	fruits	3	T34	main sector	mp	25	M4-organic sand
061-061	sticks	3	T34	main sector	mp	25	M4-organic sand
061-061	twigs	3	T34	main sector	mp	25	M4-organic sand
061-062	charcoals	7	V33	main sector	ep	286	M4-organic sand
061-062	barks	1	V33	main sector	ep	286	M4-organic sand
061-062	twigs	1	V33	main sector	ep	286	M4-organic sand
061-063	charcoals	2	V24	main sector	la	174	F7-formal st. str.
061-064	barks	1	R33	main sector	mp	25	M4-organic sand
061-064	fruits	1	R33	main sector	mp	25	M4-organic sand
061-065	charcoals	27	V27	main sector	la	199	M5-stone line/accumulation
061-065	grass stems	1	V27	main sector	la	199	M5-stone line/accumulation
061-066	charcoals	5	R33	main sector	mp	25	M4-organic sand
061-066	barks	3	R33	main sector	mp	25	M4-organic sand
061-066	grass stems	2	R33	main sector	mp	25	M4-organic sand
061-066	fruits	8	R33	main sector	mp	25	M4-organic sand
061-066	inflorescences	1	R33	main sector	mp	25	M4-organic sand
061-067	charcoals	4	U27	main sector	la	156	M4-organic sand
061-067	barks	6	U27	main sector	la	156	M4-organic sand
061-067	fruits	2	U27	main sector	la	156	M4-organic sand
061-067	sticks	1	U27	main sector	la	156	M4-organic sand
061-067	twigs	1	U27	main sector	la	156	M4-organic sand
061-068	charcoals	1	T27	main sector	la	156	M4-organic sand
061-068	barks	1	T27	main sector	la	156	M4-organic sand
061-068	grass stems	1	T27	main sector	la	156	M4-organic sand
061-068	fruits	1	T27	main sector	la	156	M4-organic sand
061-068	sticks	2	T27	main sector	la	156	M4-organic sand
061-069	barks	4	T23	main sector	la	172	M4-organic sand
061-069	sticks	2	T23	main sector	la	172	M4-organic sand
061-070	charcoals	2	U34	main sector	mp	25	M4-organic sand
061-070	fruits	3	U34	main sector	mp	25	M4-organic sand
061-071	charcoals	15	S25	main sector	la	173	M8-floor
061-071	barks	60	S25	main sector	la	173	M8-floor
061-071	grass stems	30	S25	main sector	la	173	M8-floor
061-071	fruits	1	S25	main sector	la	173	M8-floor
061-071	sticks	28	S25	main sector	la	173	M8-floor
061-071	twigs	17	S25	main sector	la	173	M8-floor
061-072	charcoals	8	U31	main sector	ep	286	M4-organic sand
061-072	barks	3	U31	main sector	ep	286	M4-organic sand
061-072	grass stems	5	U31	main sector	ep	286	M4-organic sand
061-072	fruits	3	U31	main sector	ep	286	M4-organic sand
061-072	sticks	2	U31	main sector	ep	286	M4-organic sand
061-072	twigs	1	U31	main sector	ep	286	M4-organic sand
061-073	barks	1	V34	main sector	lp	222	F1-pit
061-073	fruits	1	V34	main sector	lp	222	F1-pit
061-074	charcoals	7	S34	main sector	mp	206	F4-hearth
061-074	barks	3	S34	main sector	mp	206	F4-hearth
061-074	fruits	11	S34	main sector	mp	206	F4-hearth
061-074	sticks	1	S34	main sector	mp	206	F4-hearth
061-076	charcoals	2	S32	main sector	mp	25	M4-organic sand
061-076	grass stems	2	S32	main sector	mp	25	M4-organic sand
[truncated: 2,509 more rows]
